# Supplementary material for: Enhanced direct air capture by uranyl superoxide: a comprehensive study of the carbonation reaction of uranyl peroxide complexes
Source: Royal Society of Chemistry journal article supplement (doi:10.1039/d5ta01836f), 2025-01-01
Supplement: d5ta01836f1.pdf [file d5ta01836f1.pdf]

## Enhanced Direct Air Capture by Uranyl Superoxide: A Comprehensive Study of the Carbonation Reaction of Uranyl Peroxide Complexes

Sarah K. Scherrer<sup>a</sup>, Tori Forbes<sup>a,\*</sup>

<sup>a</sup> Department of Chemistry, University of Iowa, Iowa City, Iowa 52242, United States

\* Correspondence to: [tori-forbes@uiowa.edu](mailto:tori-forbes@uiowa.edu)

### Table of Contents

#### Reaction Apparatus

|                                                                                                                         |          |
|-------------------------------------------------------------------------------------------------------------------------|----------|
| <b>Figure S1.</b> Diagram of the custom-built apparatus utilized for the flow-through experiments.....                  | <b>3</b> |
| <b>Figure S2.</b> Image of the air-tight apparatus equipped with a CO <sub>2</sub> sensor used for kinetic studies..... | <b>3</b> |

#### Characterization of the pure materials

|                                                                                                                                                         |           |
|---------------------------------------------------------------------------------------------------------------------------------------------------------|-----------|
| <b>Figure S3.</b> PXRD of the pristine KUT-1 material.....                                                                                              | <b>4</b>  |
| <b>Figure S4.</b> PXRD of the pristine KUPS-1 material.....                                                                                             | <b>4</b>  |
| <b>Figure S5.</b> PXRD of the pristine KUT material.....                                                                                                | <b>5</b>  |
| <b>Figure S6.</b> PXRD of the pristine KUPS material.....                                                                                               | <b>5</b>  |
| <b>Figure S7.</b> PXRD of the U(VI) peroxo-carbonate compound.....                                                                                      | <b>6</b>  |
| <b>Figure S8.</b> EPR spectrum of the KUT-1 material.....                                                                                               | <b>6</b>  |
| <b>Figure S9.</b> EPR spectrum of the KUPS-1 material.....                                                                                              | <b>7</b>  |
| <b>Figure S10.</b> EPR spectrum of the KUT material.....                                                                                                | <b>7</b>  |
| <b>Figure S11.</b> EPR spectrum of the KUPS material.....                                                                                               | <b>8</b>  |
| <b>Figure S12.</b> Fitted Raman spectrum of KUT-1.....                                                                                                  | <b>8</b>  |
| <b>Figure S13.</b> Fitted Raman spectrum of KUPS-1.....                                                                                                 | <b>9</b>  |
| <b>Figure S14.</b> Fitted Raman spectrum of KUT.....                                                                                                    | <b>9</b>  |
| <b>Figure S15.</b> Fitted Raman spectrum of KUPS.....                                                                                                   | <b>10</b> |
| <b>Figure S16.</b> Fitted Raman spectrum of K <sub>4</sub> (UO <sub>2</sub> (O <sub>2</sub> )(CO <sub>3</sub> ) <sub>2</sub> • 2.5H <sub>2</sub> O..... | <b>10</b> |

#### Elemental Analysis of Carbonation Reactions

|                                                                |           |
|----------------------------------------------------------------|-----------|
| <b>Table S1.</b> Average carbon content for each material..... | <b>11</b> |
|----------------------------------------------------------------|-----------|

#### Spectral and Structural Characterization throughout carbonation reaction

|                                                                                                                                      |           |
|--------------------------------------------------------------------------------------------------------------------------------------|-----------|
| <b>Figure S17.</b> PXRD of KUT-1 following 2 hours of CO <sub>2</sub> exposure with 15% relative humidity.....                       | <b>12</b> |
| <b>Figure S18.</b> Fitted Raman spectrum of KUT-1 exposed to CO <sub>2</sub> at 45% RH for 2 hours and then aged for three days..... | <b>12</b> |
| <b>Figure S19.</b> PXRD of KUT-1 exposed to CO <sub>2</sub> at 45% RH for 2 hours and then aged for 3 days.....                      | <b>13</b> |
| <b>Figure S20.</b> PXRD of the KUT-1 samples following 2 hours of air exposure at 15%, 45% and 70% relative humidity.....            | <b>13</b> |

|                                                                                                                                          |    |
|------------------------------------------------------------------------------------------------------------------------------------------|----|
| <b>Figure S21.</b> EPR spectrum of the KUT-1 material after air exposure with 15% relative humidity .....                                | 14 |
| <b>Figure S22.</b> Fitted Raman spectrum of KUT-1 three days after exposure to compressed air .....                                      | 14 |
| <b>Figure S23.</b> PXRD of the KUT-1 exposed to compressed air for 2 hours at 45% RH and then aged for 3 days .....                      | 15 |
| <b>Figure S24.</b> Raman fitting parameters for KUT-1 6 days after the exposure to compressed air for 2 hours at 15% RH experiment ..... | 15 |
| <b>Figure S25.</b> PXRD of the KUT-1 exposed to compressed air for 2 hours at 15% RH and then aged for 6 days .....                      | 16 |
| <b>Figure S26.</b> PXRD of the KUPS-1 samples following 2 hours of air exposure at 15%, 45% and 70% relative humidity .....              | 16 |
| <b>Figure S27.</b> PXRD of KUPS-1 following 2 hours of CO <sub>2</sub> exposure with 15% relative humidity .....                         | 17 |
| <b>Figure S28.</b> PXRD of the KUT samples following 2 hours of air exposure at 15%, 45% and 70% relative humidity .....                 | 17 |
| <b>Figure S29.</b> PXRD of the KUPS samples following 2 hours of air exposure at 15%, 45% and 70% relative humidity .....                | 18 |
| <b>Figure S30.</b> PXRD of KUT following 2 hours of CO <sub>2</sub> exposure with 15% relative humidity .....                            | 18 |
| <b>Figure S31.</b> PXRD of KUPS following 2 hours of CO <sub>2</sub> exposure with 15% relative humidity .....                           | 19 |
| <b>Figure S32.</b> Raman Spectrum of KUT-1 exposed to ambient laboratory air for 24 hours .....                                          | 19 |
| <b>Figure S33.</b> PXRD of the KUT-1 sample exposed to open air for 1 day .....                                                          | 20 |
| <b>Figure S34.</b> Raman Spectrum of KUT-1 exposed to a continuous flow of air for 24 hours .....                                        | 20 |
| <b>Figure S35.</b> PXRD of the KUT-1 sample exposed to a continuous flow of air for 24 hours .....                                       | 21 |

## Carbonation Reaction Kinetic Modelling

|                                                                                               |    |
|-----------------------------------------------------------------------------------------------|----|
| <b>Figure S36.</b> First-order modelling of the carbonation kinetics for KUT-1 .....          | 22 |
| <b>Figure S37.</b> Second-order modelling of the carbonation kinetics for KUT-1 .....         | 22 |
| <b>Figure S38.</b> Elovich modelling of the carbonation kinetics for KUT-1 .....              | 23 |
| <b>Figure S39.</b> Richie second-order modelling of the carbonation kinetics for KUT-1 .....  | 23 |
| <b>Figure S40.</b> Rate controlling modelling of the carbonation kinetics for KUT-1 .....     | 24 |
| <b>Figure S41.</b> First-order modelling of the carbonation kinetics for KUPS-1 .....         | 24 |
| <b>Figure S42.</b> Second-order modelling of the carbonation kinetics for KUPS-1 .....        | 25 |
| <b>Figure S43.</b> Elovich modelling of the carbonation kinetics for KUPS-1 .....             | 25 |
| <b>Figure S44.</b> Richie second-order modelling of the carbonation kinetics for KUPS-1 ..... | 26 |
| <b>Figure S45.</b> Rate controlling modelling of the carbonation kinetics for KUPS-1 .....    | 26 |
| <b>Figure S46.</b> First-order modelling of the carbonation kinetics for KUT .....            | 27 |
| <b>Figure S47.</b> Second-order modelling of the carbonation kinetics for KUT .....           | 27 |
| <b>Figure S48.</b> Elovich modelling of the carbonation kinetics for KUT .....                | 28 |
| <b>Figure S49.</b> Richie second-order modelling of the carbonation kinetics for KUT .....    | 28 |
| <b>Figure S50.</b> Rate controlling modelling of the carbonation kinetics for KUT .....       | 29 |
| <b>Figure S51.</b> First-order modelling of the carbonation kinetics for KUPS .....           | 29 |
| <b>Figure S52.</b> Second-order modelling of the carbonation kinetics for KUPS .....          | 30 |
| <b>Figure S53.</b> Elovich modelling of the carbonation kinetics for KUPS .....               | 30 |
| <b>Figure S54.</b> Richie second-order modelling of the carbonation kinetics for KUPS .....   | 31 |
| <b>Figure S55.</b> Rate controlling modelling of the carbonation kinetics for KUPS .....      | 31 |

## Reaction Apparatus

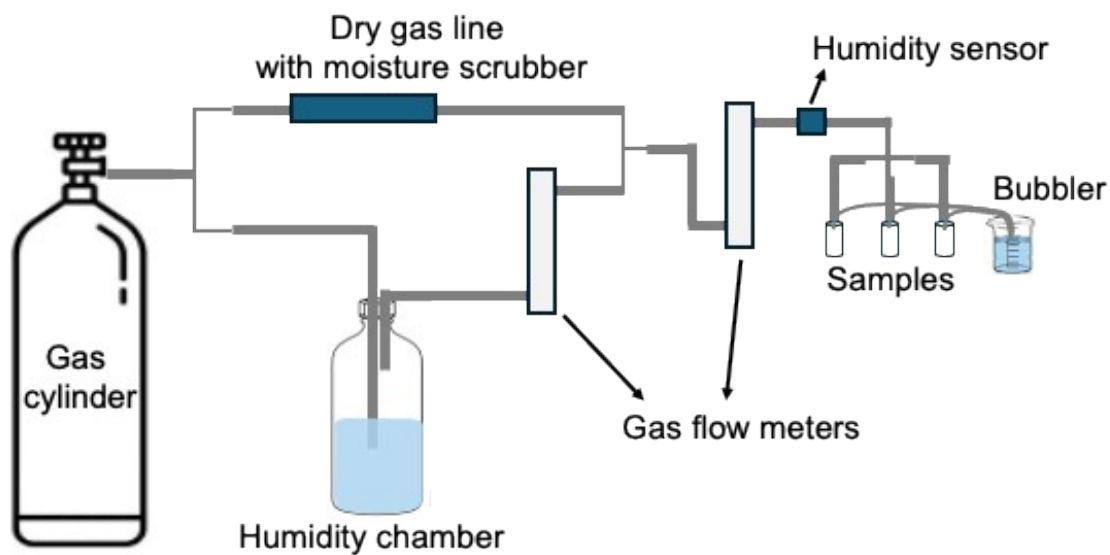

**Figure S1.** Diagram of the custom-built apparatus utilized for the flow-through experiments.

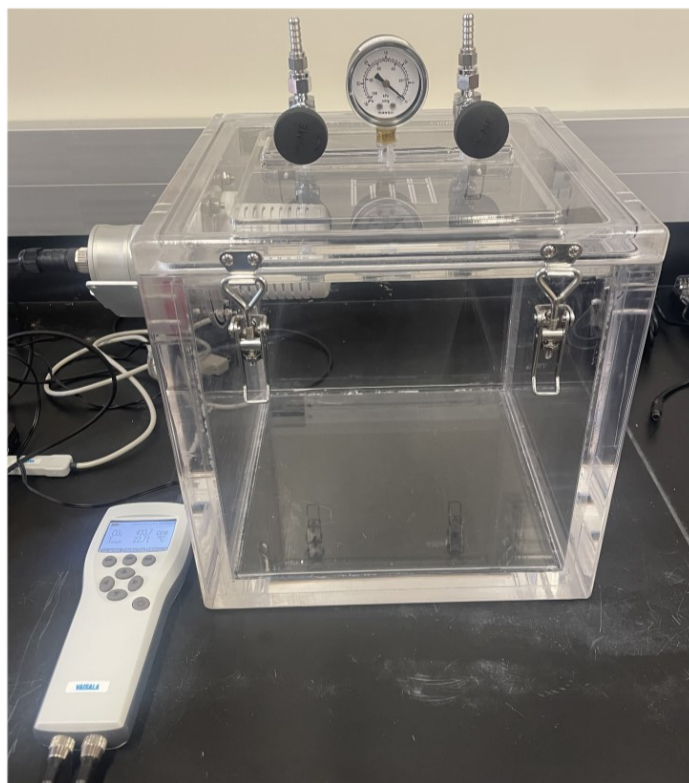

**Figure S2.** Image of the air-tight apparatus equipped with a CO<sub>2</sub> sensor used for kinetic studies.

### Characterization of the pure materials

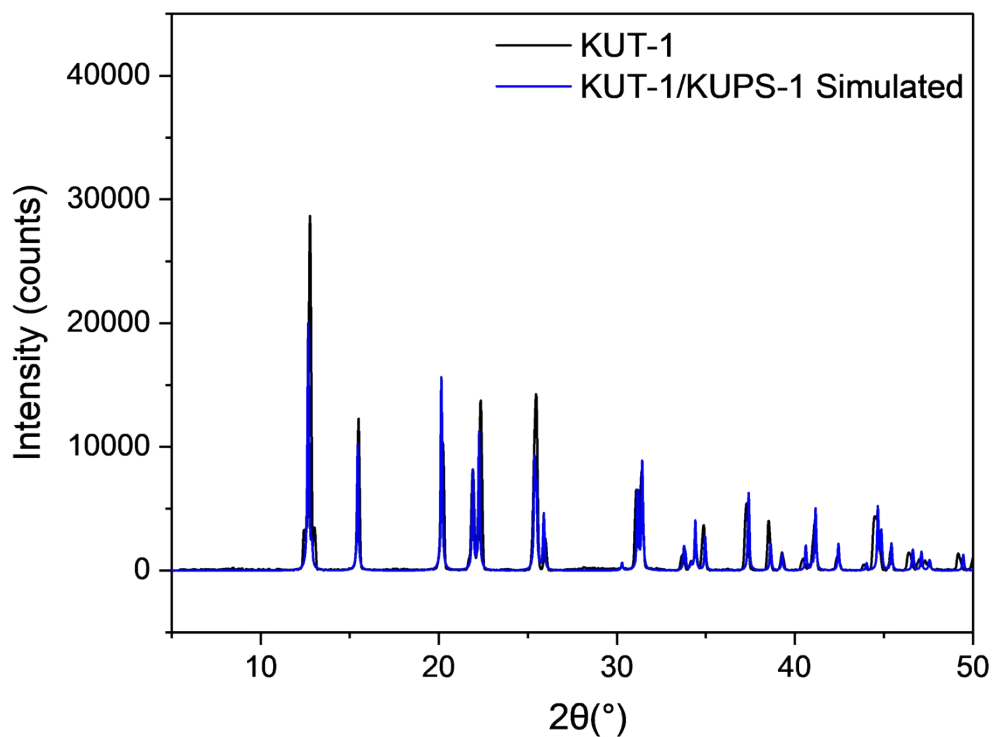

**Figure S3.** PXRD of the pristine KUT-1 material (black) and the simulated KUT-1 pattern (blue).

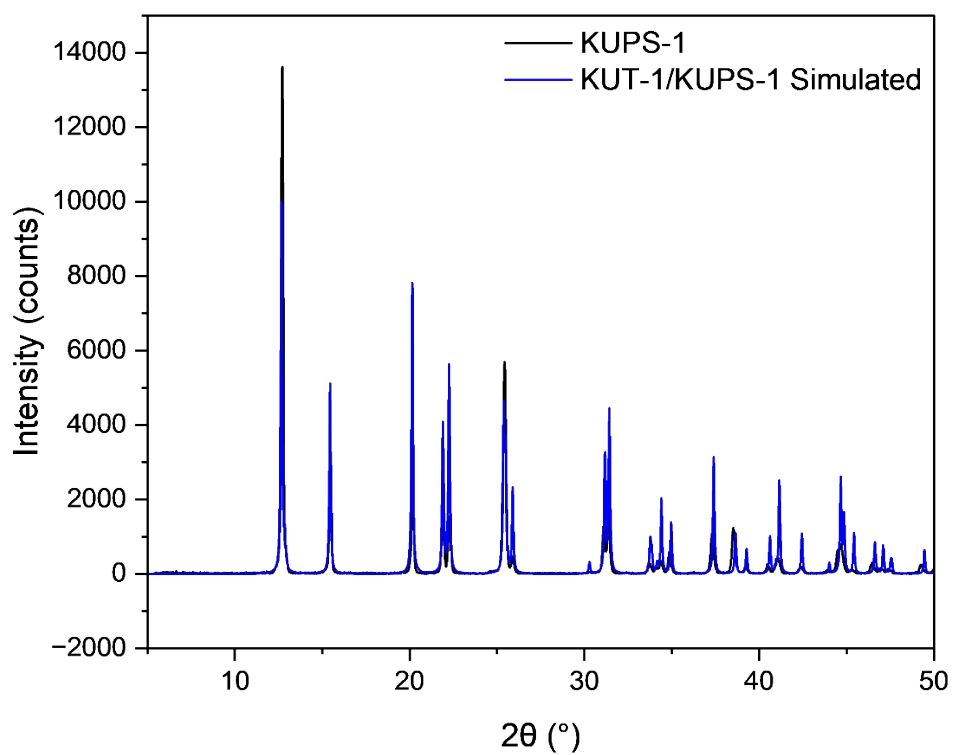

**Figure S4.** PXRD of the pristine KUPS-1 material (black) and the simulated KUPS-1 pattern (blue).

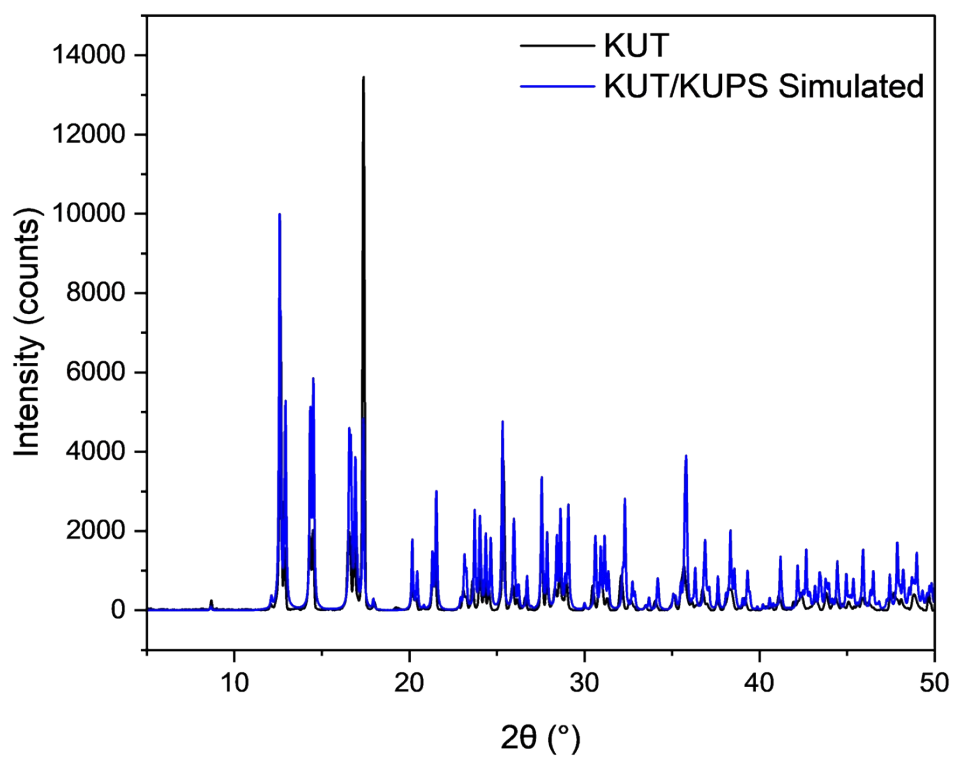

**Figure S5.** PXRD of the pristine KUT material (black) and the simulated KUT pattern (blue).

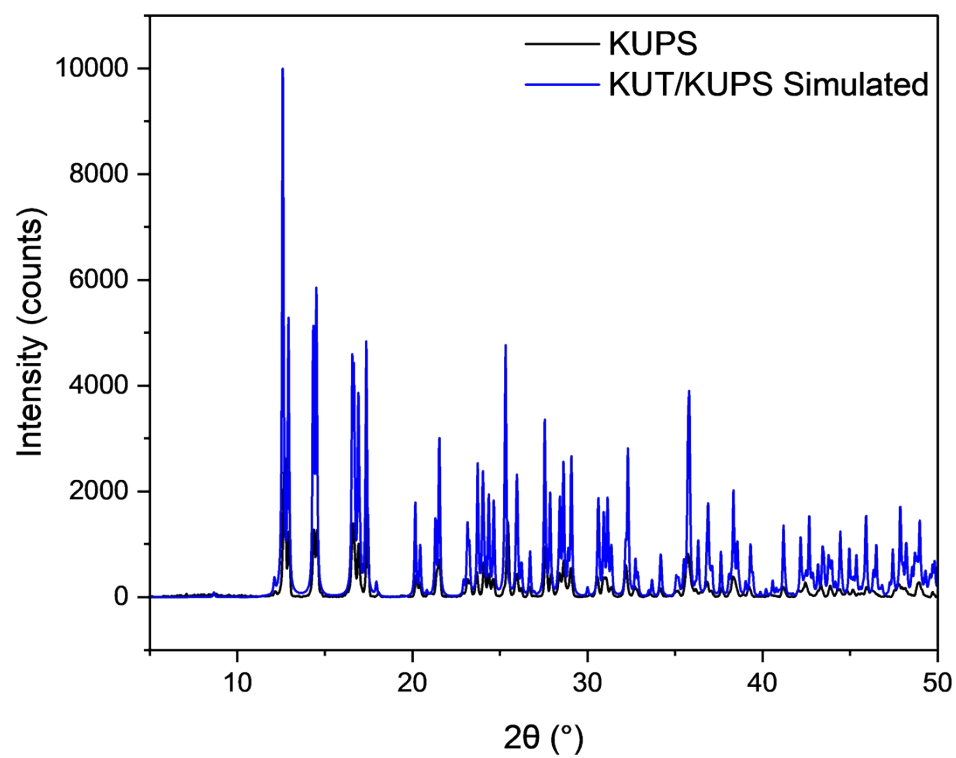

**Figure S6.** PXRD of the pristine KUPS material (black) and the simulated KUPS pattern (blue).

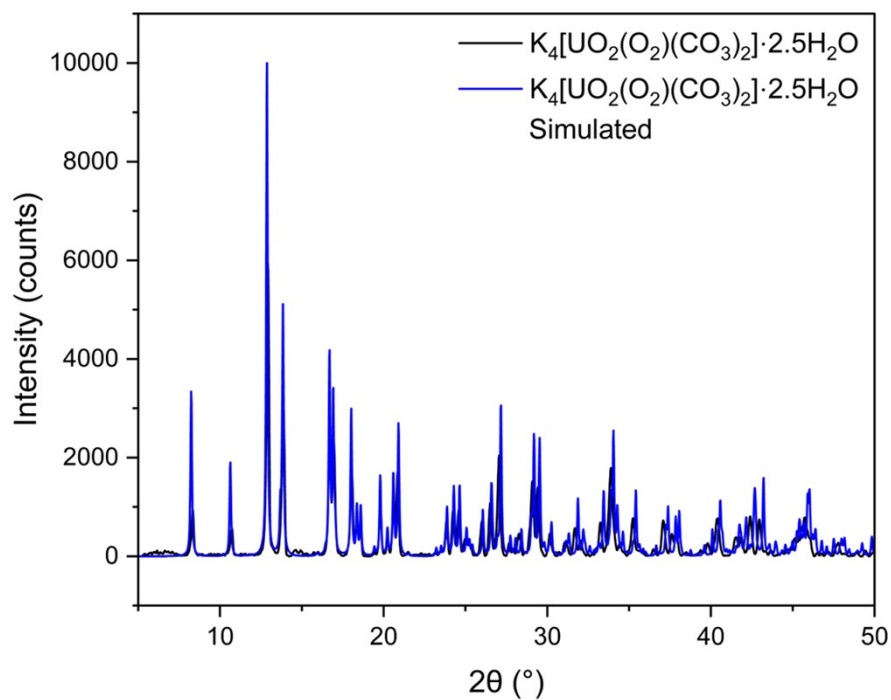

**Figure S7.** PXRD of the U(VI) peroxy-carbonate compound (black) and the pattern simulated from the structural characterization by Goff *et al.* (blue).

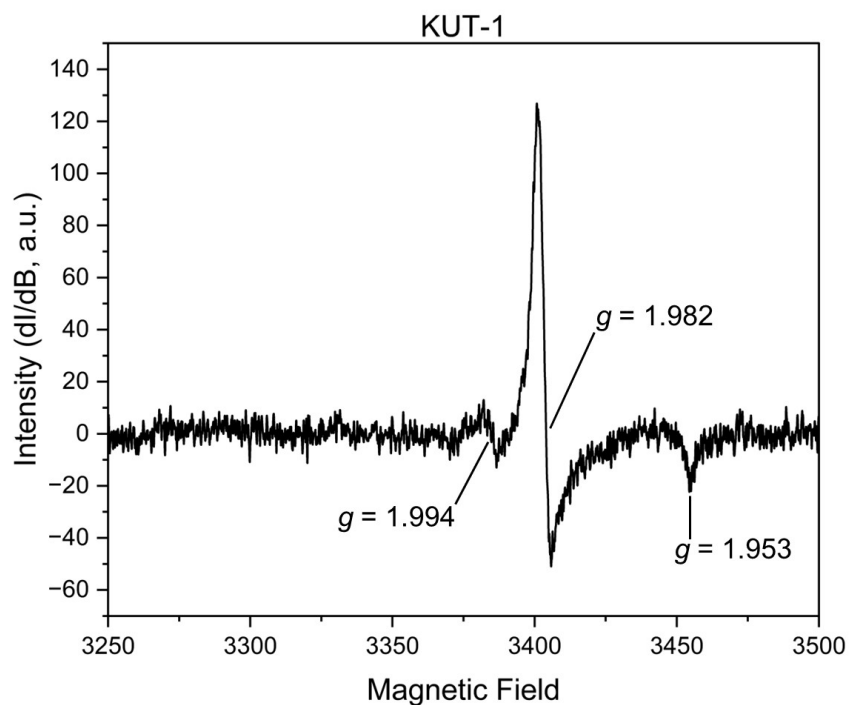

**Figure S8.** EPR spectrum of the KUT-1 material. Features at  $g = 1.994$ ,  $1.982$ , and  $1.953$  correspond to a Cr(V) peroxide trace contaminant.

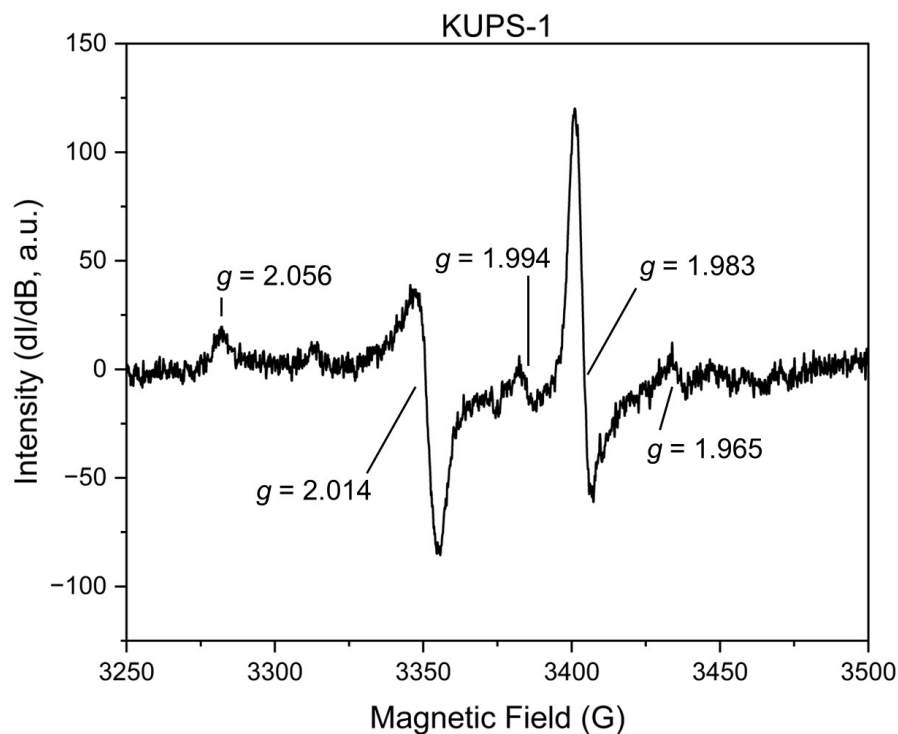

**Figure S9.** EPR spectrum of the KUPS-1 material. Features at  $g = 1.994$ ,  $1.982$ , and  $1.965$  correspond to a Cr(V) peroxide trace contaminant. Additional signatures ( $g_{\parallel} = 2.056$ ,  $g_{\perp} = 2.014$ ) have been identified as superoxide complexed to the U(VI) cation.

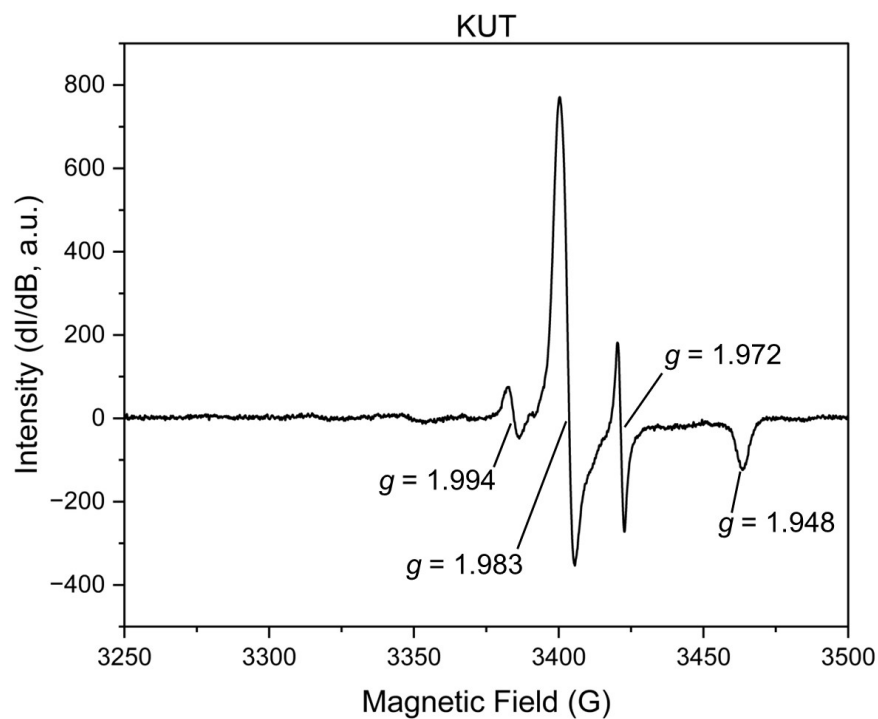

**Figure S10.** EPR spectrum of the KUT material. Features at  $g = 1.994$ ,  $1.983$ ,  $1.972$  and  $1.948$  correspond to a Cr(V) peroxide trace contaminant.

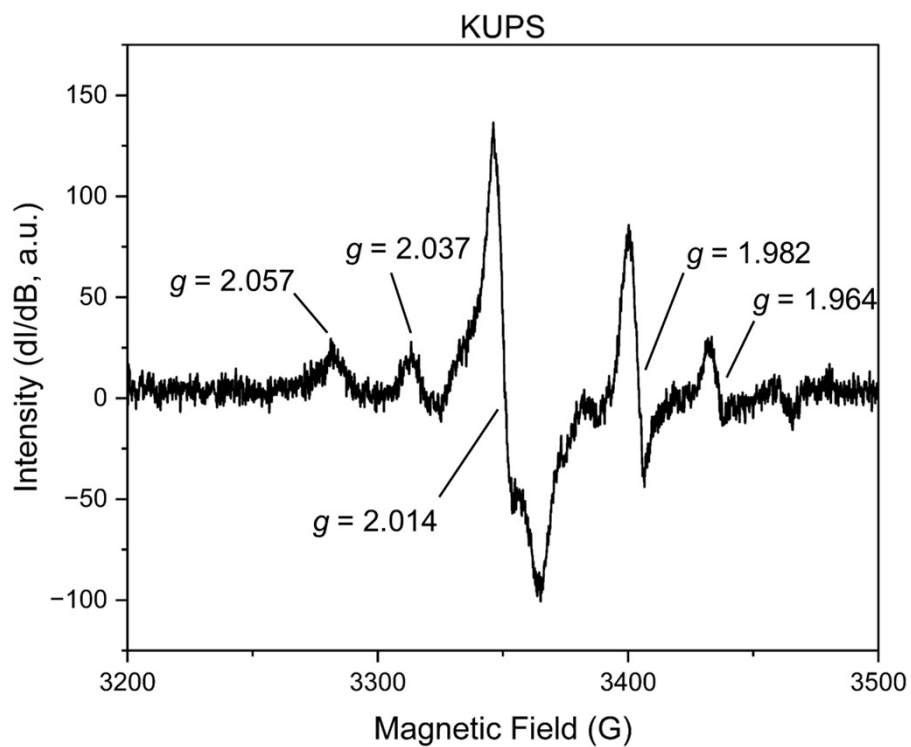

**Figure S11.** EPR spectrum of the KUPS material. Features at  $g = 1.982$  and  $1.964$  correspond to a Cr(V) peroxide trace contaminant. Additional signatures ( $g_{\parallel} = 2.057/2.037$ ,  $g_{\perp} = 2.014$ ) correspond to superoxide complexed to the U(VI) cation.

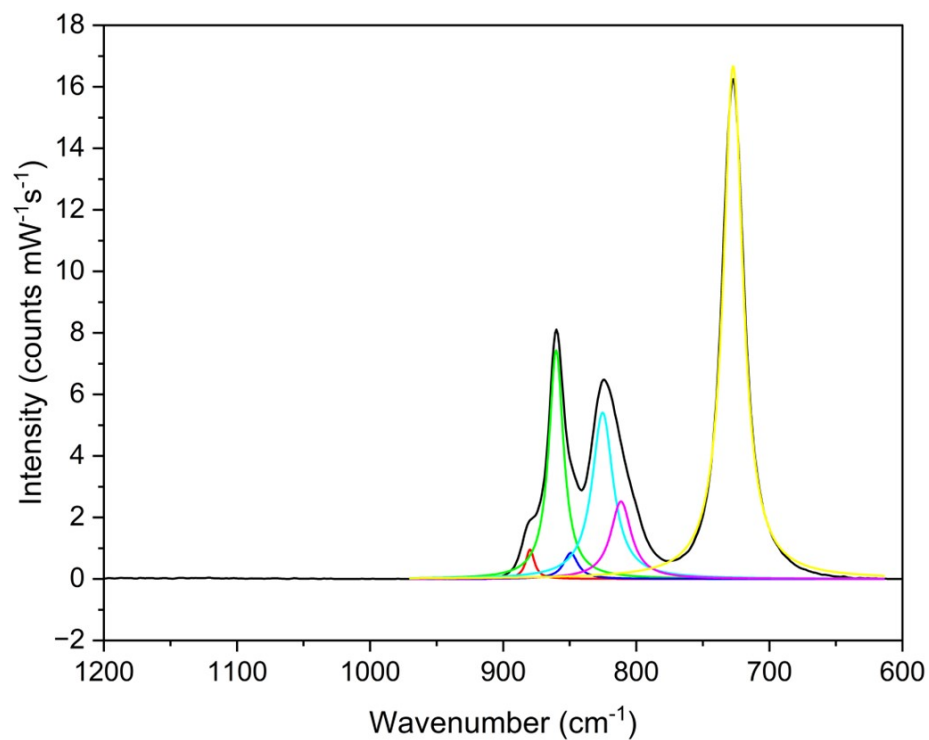

**Figure S12.** Fitted Raman spectrum of KUT-1 in the spectral window of interest ( $\chi^2 = 0.05$ ;  $R^2 = 0.999$ ).



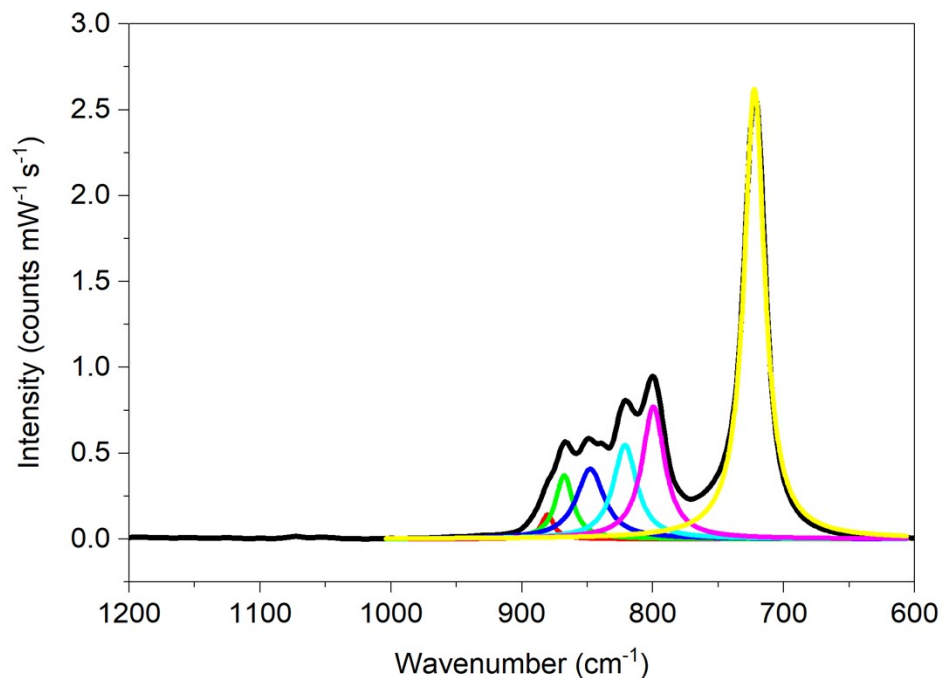

**Figure S13.** Fitted Raman spectrum of KUPS-1 in the spectral window of interest ( $\chi^2 = 7.87 \times 10^{-4}$ ;  $R^2 = 0.997$ ).

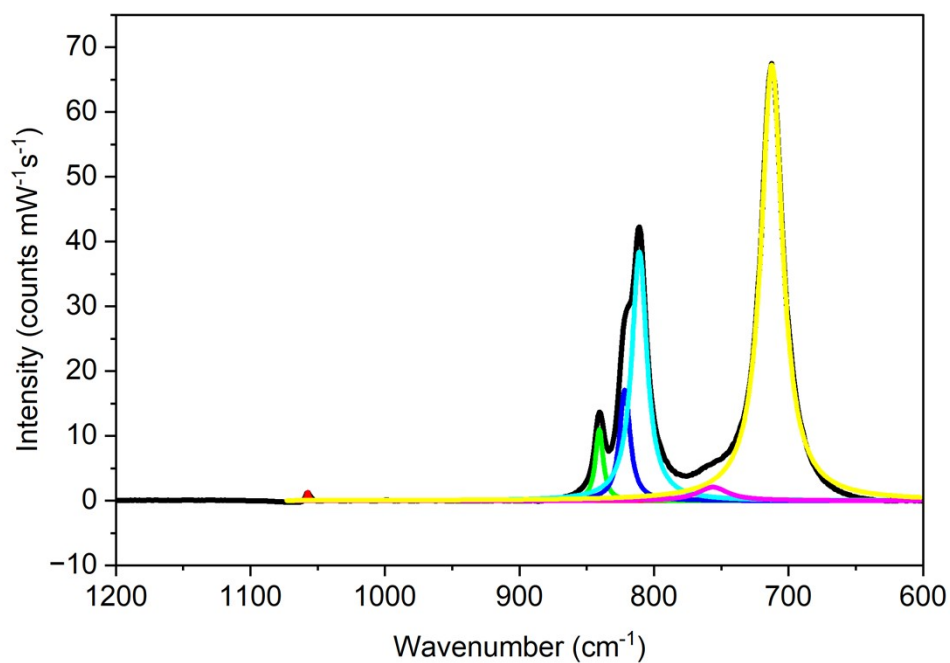

**Figure S14.** Fitted Raman spectrum of KUT in the spectral window of interest ( $\chi^2 = 0.28$ ;  $R^2 = 0.998$ ). Additional feature at  $1057 \text{ cm}^{-1}$  indicates a small amount of carbonate on the surface of the sample.

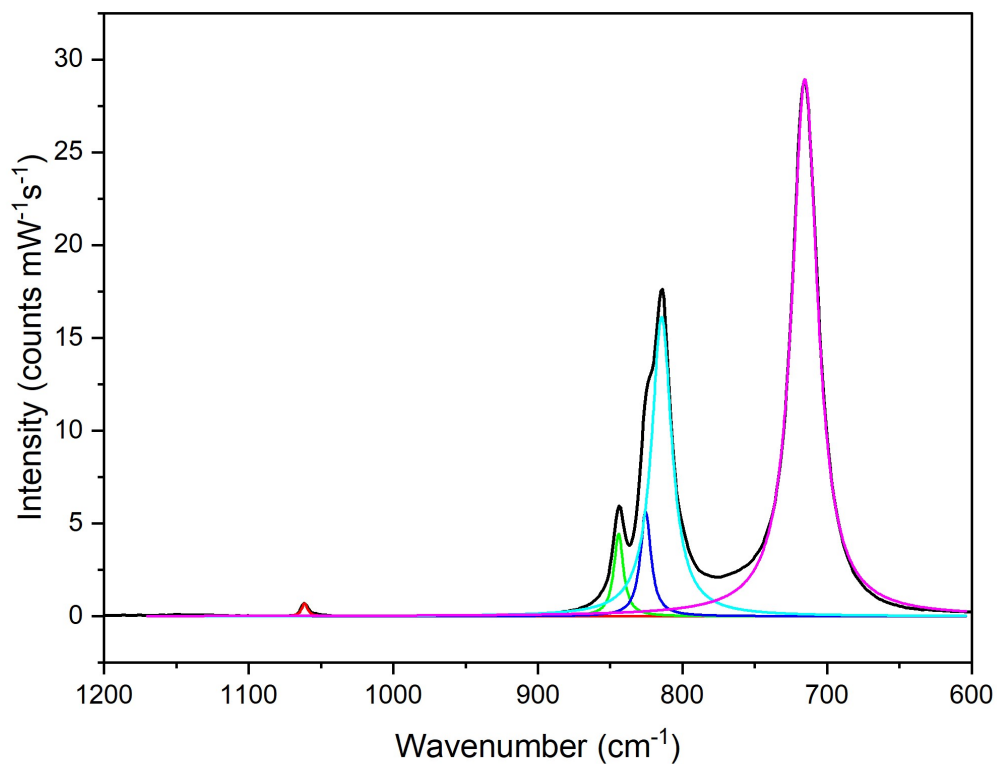

**Figure S15.** Fitted Raman spectrum of KUPS in the spectral window of interest ( $\chi^2 = 0.041$ ;  $R^2 = 0.999$ ). Additional feature at  $1061 \text{ cm}^{-1}$  indicates a small amount of carbonate on the surface of the sample.

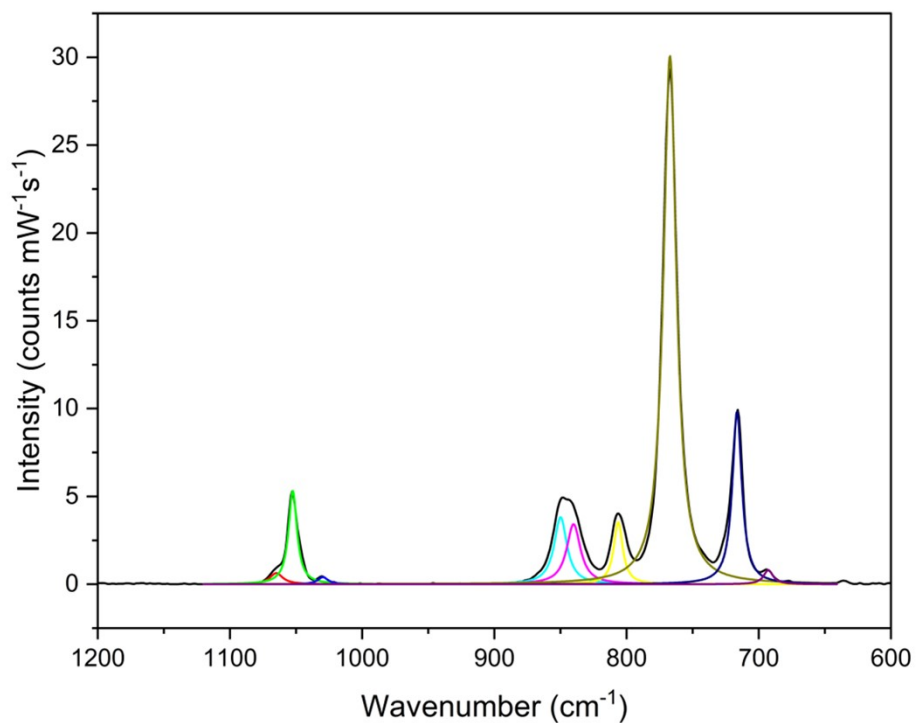

**Figure S16.** Fitted Raman spectrum of  $\text{K}_4(\text{UO}_2(\text{O}_2)(\text{CO}_3)_2) \cdot 2.5\text{H}_2\text{O}$  in the spectral window of interest of ( $\chi^2 = 0.08$ ;  $R^2 = 0.999$ ).

## Elemental Analysis of Carbonation Reactions

**Table S1.** Average carbon content for each material as synthesized, after reaction with pure CO<sub>2</sub> and compressed air at different relative humidity values, and after the kinetics batch studies.

| Sample          |        | % C           | mol C/mol U   |
|-----------------|--------|---------------|---------------|
| KUT-1           |        | 0.095 ± 0.004 | 0.057 ± 0.002 |
| CO <sub>2</sub> | 15% RH | 0.207 ± 0.129 | 0.125 ± 0.078 |
|                 | 45% RH | 4.800 ± 0.065 | 2.896 ± 0.039 |
|                 | 70% RH | 4.290 ± 0.040 | 2.588 ± 0.024 |
| Compressed Air  | 15% RH | 0.117 ± 0.031 | 0.070 ± 0.019 |
|                 | 45% RH | 0.240 ± 0.152 | 0.145 ± 0.092 |
|                 | 70% RH | 0.287 ± 0.076 | 0.173 ± 0.046 |
| Kinetics Study  |        | 3.345 ± 0.201 | 2.018 ± 0.121 |
| KUPS-1          |        | 0.087 ± 0.029 | 0.052 ± 0.017 |
| CO <sub>2</sub> | 15% RH | 0.130 ± 0.081 | 0.078 ± 0.049 |
|                 | 45% RH | 3.223 ± 0.416 | 1.945 ± 0.251 |
|                 | 70% RH | 2.978 ± 0.040 | 1.797 ± 0.024 |
| Compressed Air  | 15% RH | 0.167 ± 0.017 | 0.101 ± 0.010 |
|                 | 45% RH | 0.276 ± 0.022 | 0.167 ± 0.014 |
|                 | 70% RH | 0.157 ± 0.052 | 0.095 ± 0.032 |
| Kinetics Study  |        | 3.883 ± 0.048 | 2.342 ± 0.029 |
| KUT             |        | 0.047 ± 0.082 | 0.028 ± 0.049 |
| CO <sub>2</sub> | 15% RH | 1.067 ± 0.052 | 0.643 ± 0.032 |
|                 | 45% RH | 4.397 ± 0.039 | 2.652 ± 0.023 |
|                 | 70% RH | 4.380 ± 0.020 | 2.642 ± 0.012 |
| Compressed Air  | 15% RH | 0.497 ± 0.024 | 0.300 ± 0.014 |
|                 | 45% RH | 0.427 ± 0.054 | 0.257 ± 0.033 |
|                 | 70% RH | 0.450 ± 0.010 | 0.271 ± 0.006 |
| Kinetics Study  |        | 3.028 ± 0.447 | 1.827 ± 0.270 |
| KUPS            |        | 0.045 ± 0.003 | 0.027 ± 0.002 |
| CO <sub>2</sub> | 15% RH | 0.475 ± 0.035 | 0.287 ± 0.021 |
|                 | 45% RH | 4.247 ± 0.009 | 2.562 ± 0.006 |
|                 | 70% RH | 3.093 ± 0.086 | 1.866 ± 0.052 |
| Compressed Air  | 15% RH | 0.435 ± 0.015 | 0.262 ± 0.009 |
|                 | 45% RH | 0.415 ± 0.005 | 0.250 ± 0.003 |
|                 | 70% RH | 0.440 ± 0.065 | 0.265 ± 0.039 |
| Kinetics Study  |        | 3.460 ± 0.010 | 2.087 ± 0.006 |

### Spectral and Structural Characterization throughout carbonation reaction

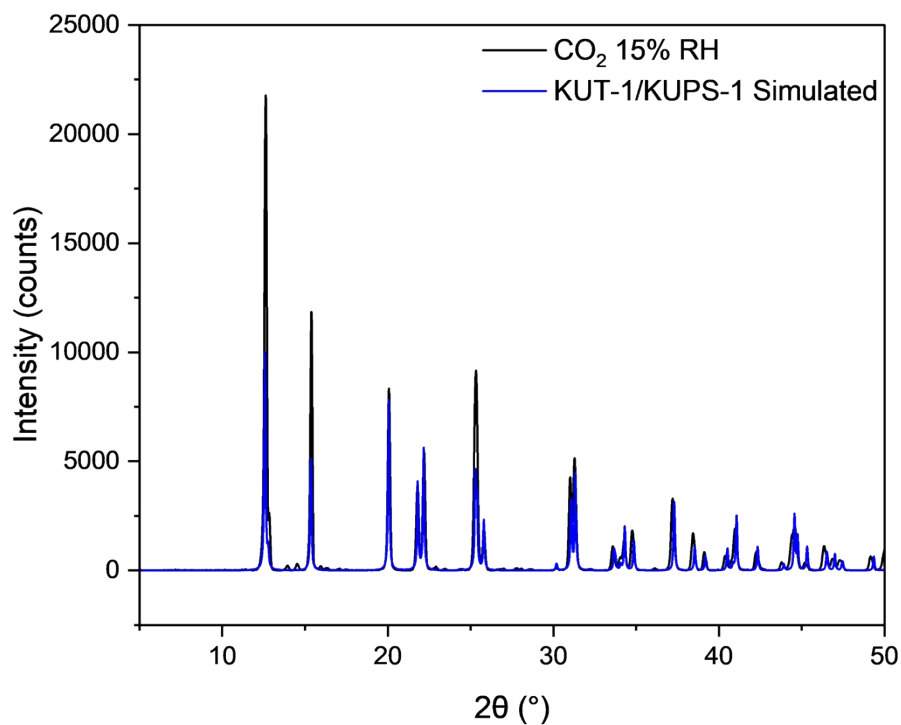

**Figure S17.** PXRD of KUT-1 following 2 hours of CO<sub>2</sub> exposure with 15% relative humidity (black) showing retention of the original material. The simulated KUT-1 pattern is shown as the blue trace.

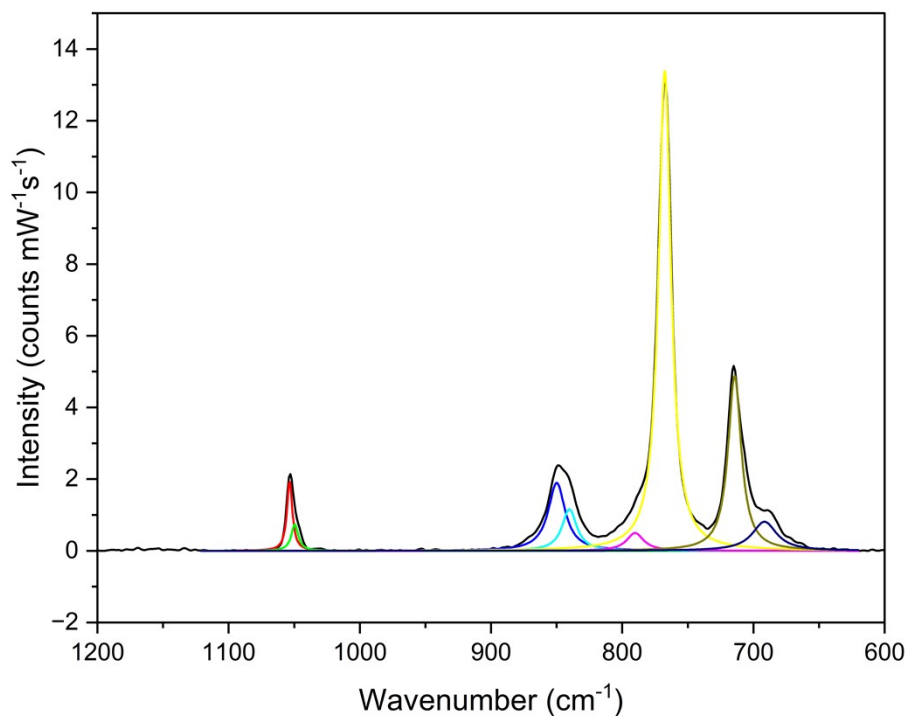

**Figure S18.** Fitted Raman spectrum of KUT-1 exposed to CO<sub>2</sub> at 45% RH for 2 hours and then aged for 3 days in a glass vial in the spectral window of interest ( $\chi^2 = 0.01$ ;  $R^2 = 0.999$ ).

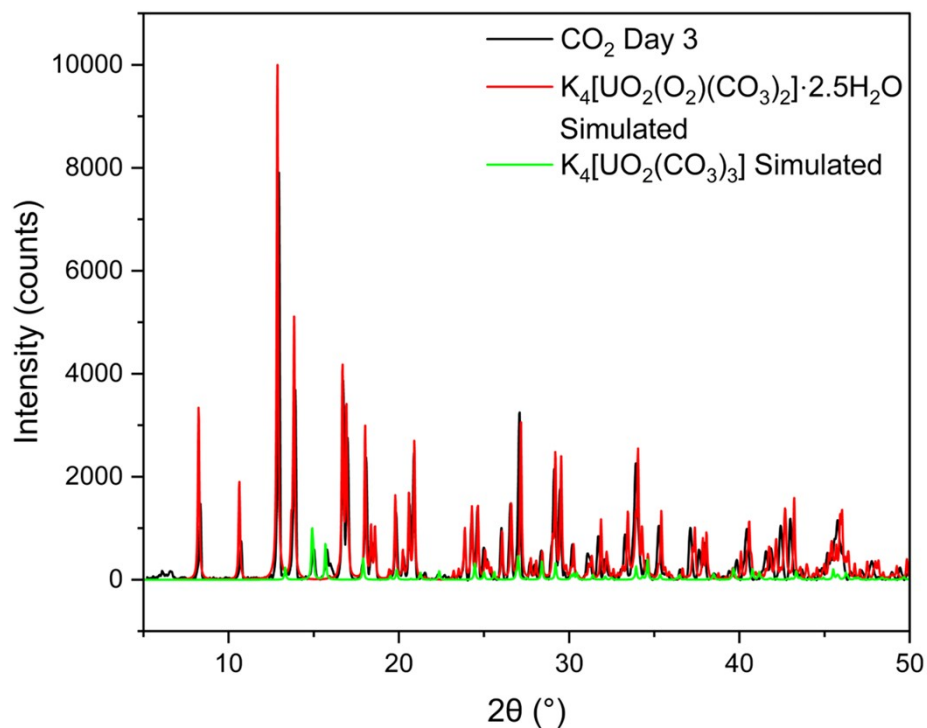

**Figure S19.** PXRD of KUT-1 exposed to CO<sub>2</sub> at 45% RH for 2 hours and then aged for 3 days in a glass vial (black) matching the simulated pattern for K<sub>4</sub>[UO<sub>2</sub>(O<sub>2</sub>)(CO<sub>3</sub>)<sub>2</sub>]·2.5H<sub>2</sub>O (red) and K<sub>4</sub>[UO<sub>2</sub>(CO<sub>3</sub>)<sub>3</sub>] (green).

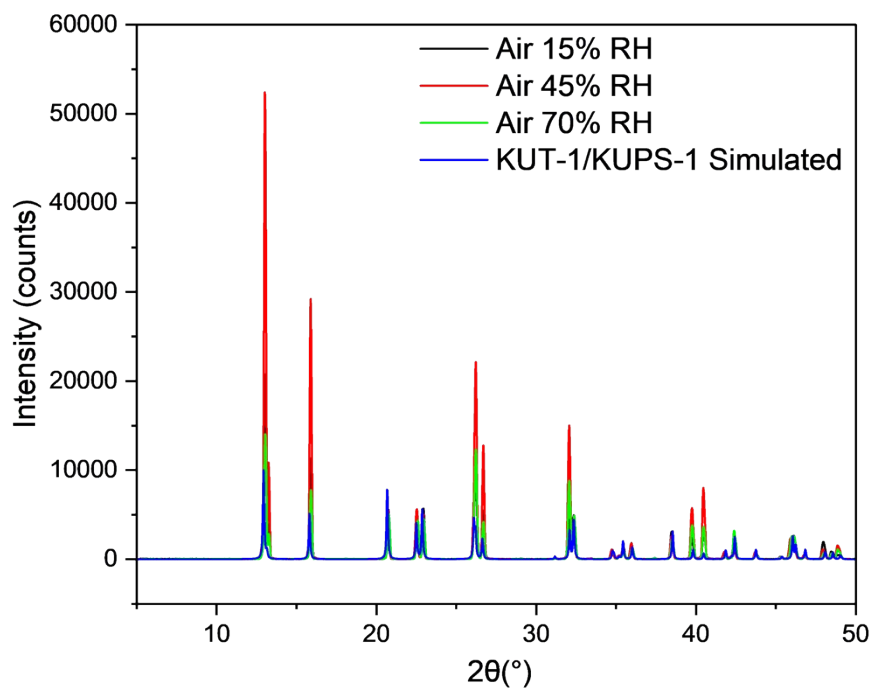

**Figure S20.** PXRD of the KUT-1 samples following 2 hours of air exposure at 15% (black), 45% (red) and 70% (green) relative humidity matching the simulated KUT-1 pattern (blue) and confirming no reactivity.

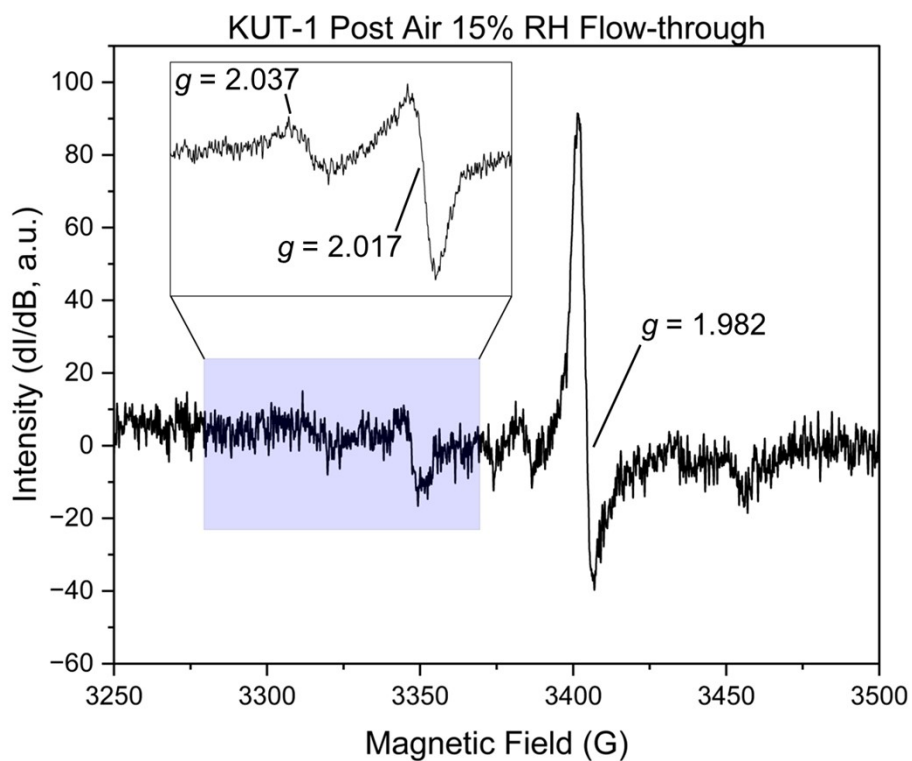

**Figure S21.** EPR spectrum of the KUT-1 material after air exposure with 15% relative humidity. The feature at  $g = 1.982$  corresponds to a Cr(V) peroxide trace contaminant. Additional signatures ( $g_{\parallel} = 2.037$ ,  $g_{\perp} = 2.017$ ) corresponds to superoxide complexed to the U(VI) cation.

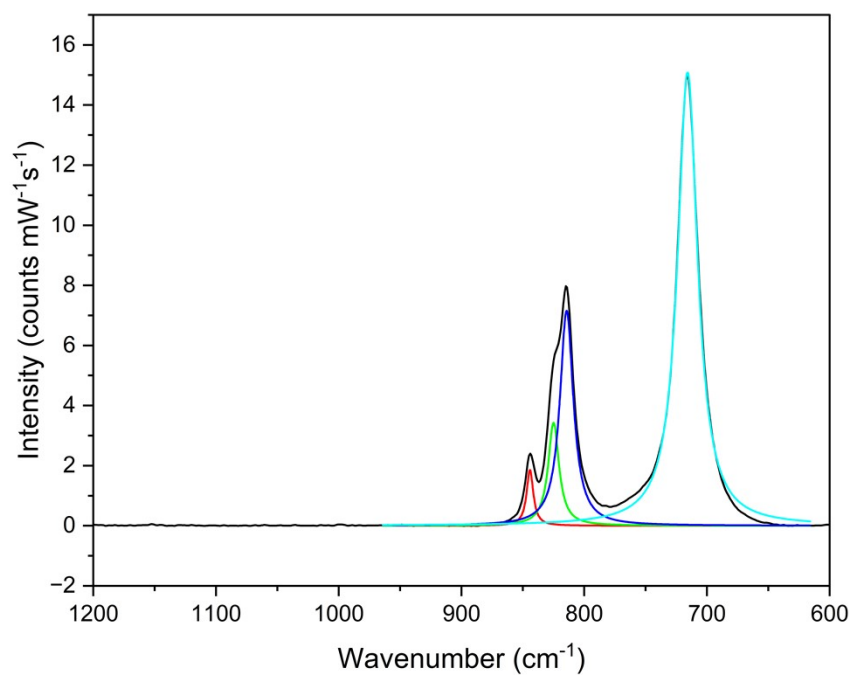

**Figure S22.** Fitted Raman spectrum of KUT-1 three days after exposure to compressed air ( $\chi^2 = 0.02$ ;  $R^2 = 0.999$ ).

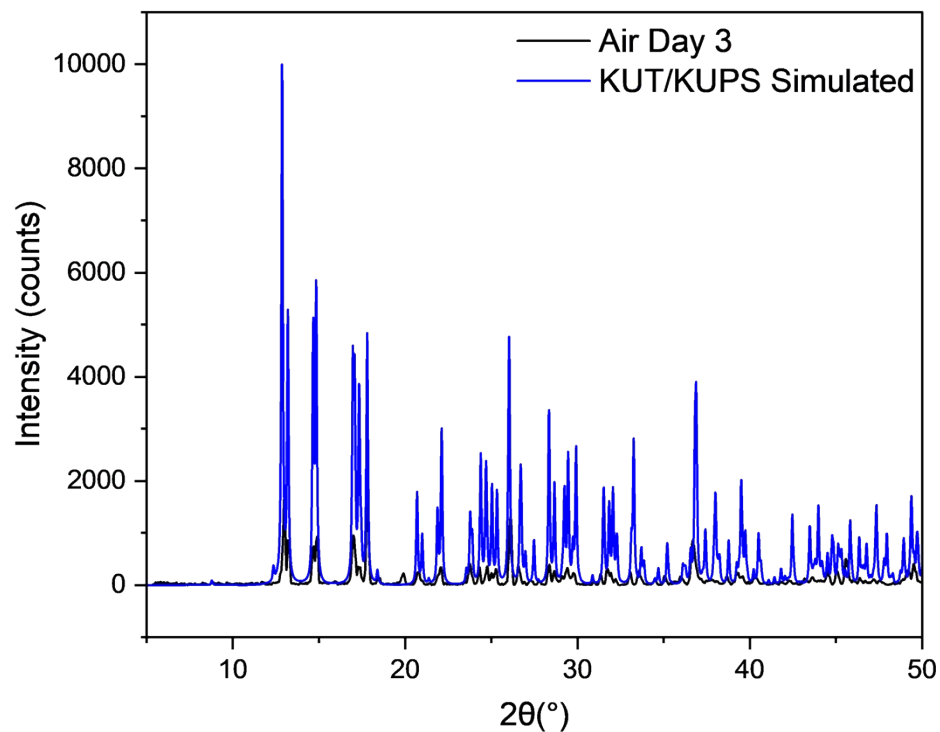

**Figure S23.** PXRD of the KUT-1 exposed to compressed air for 2 hours at 45% RH and then aged for 3 days (black) under ambient conditions showing conversion to KUT (simulated pattern in blue).

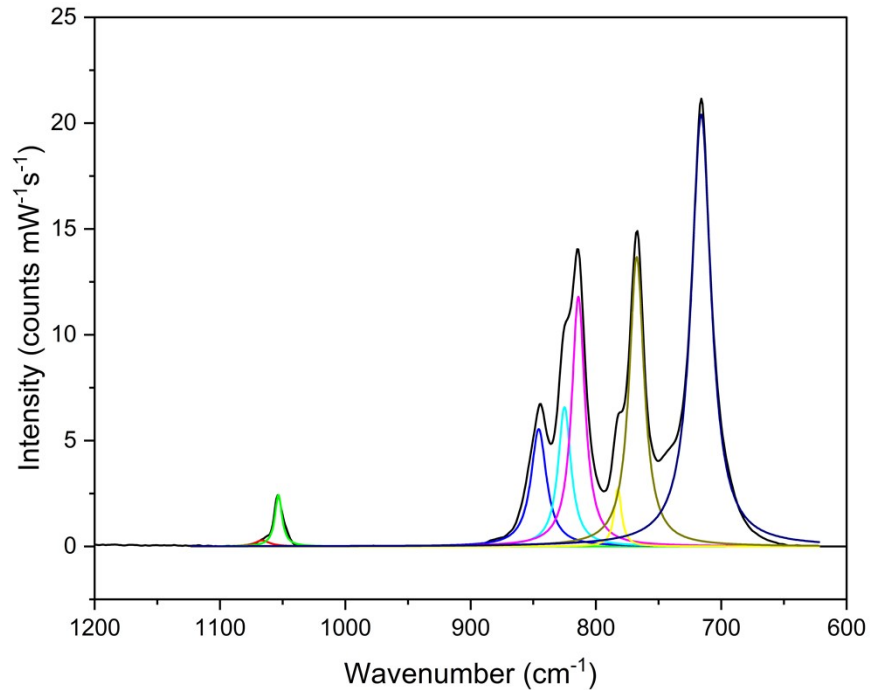

**Figure S24.** Raman fitting parameters for KUT-1 6 days after the exposure to compressed air for 2 hours at 15% RH experiment. Bands are located at 1066, 1053, 846, 814, 783, 768, and 716 cm<sup>-1</sup> ( $\chi^2 = 0.06$ ;  $R^2 = 0.999$ ).

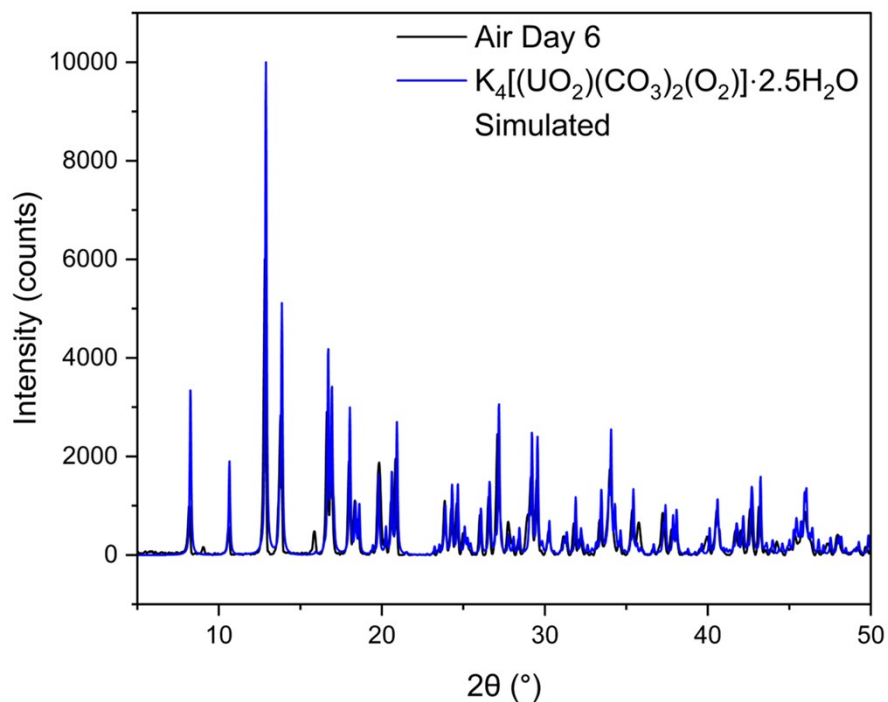

**Figure S25.** PXRD of the KUT-1 exposed to compressed air for 2 hours at 15% RH and then aged for 6 days (black) under ambient conditions showing further conversion from KUT (Fig. S21) to the potassium uranyl peroxo-carbonate phase (simulated pattern in blue).

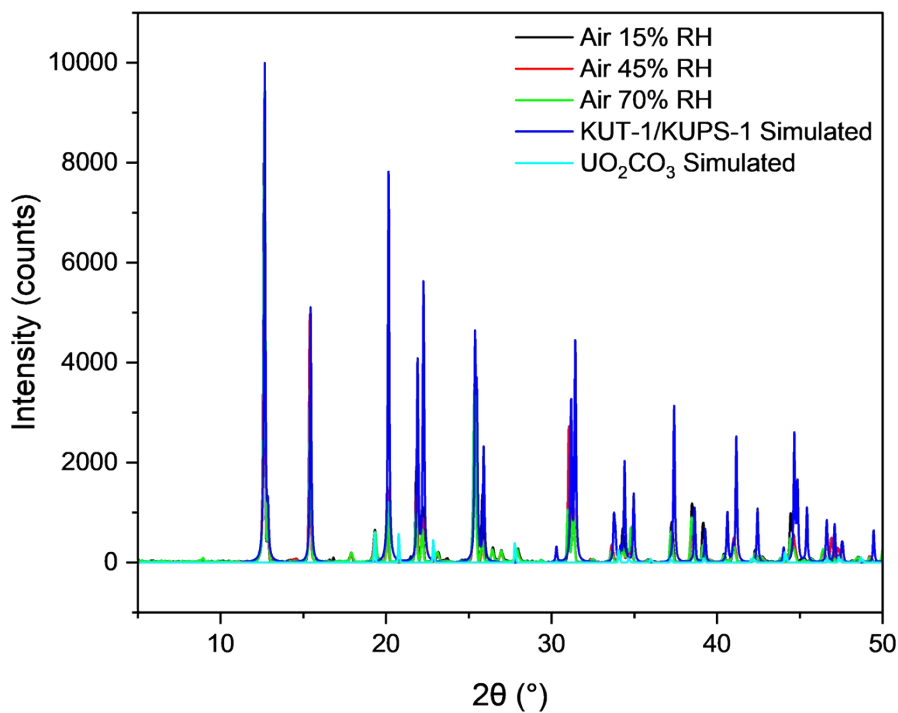

**Figure S26.** PXRD of the KUPS-1 samples following 2 hours of air exposure at 15% (black), 45% (red) and 70% (green) relative humidity matching the simulated KUPS-1 pattern (blue) and UO<sub>2</sub>CO<sub>3</sub> (teal).



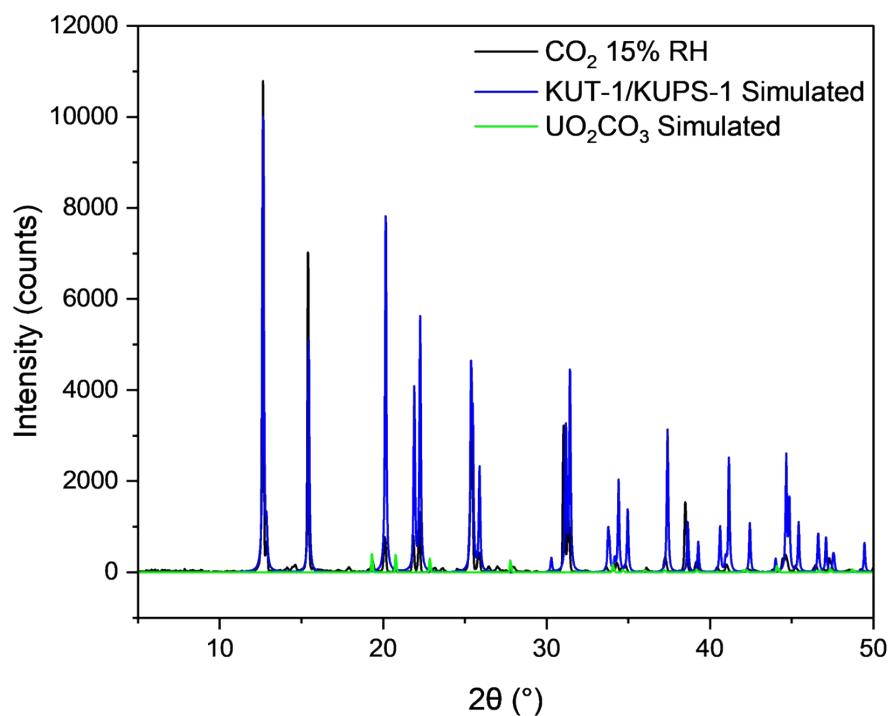

**Figure S27.** PXRD of KUPS-1 following 2 hours of CO<sub>2</sub> exposure with 15% relative humidity (black) showing retention of the KUPS-1 phase with the simulated KUPS-1 pattern in blue, in addition to new smaller features matching with the simulated UO<sub>2</sub>CO<sub>3</sub> pattern (green).

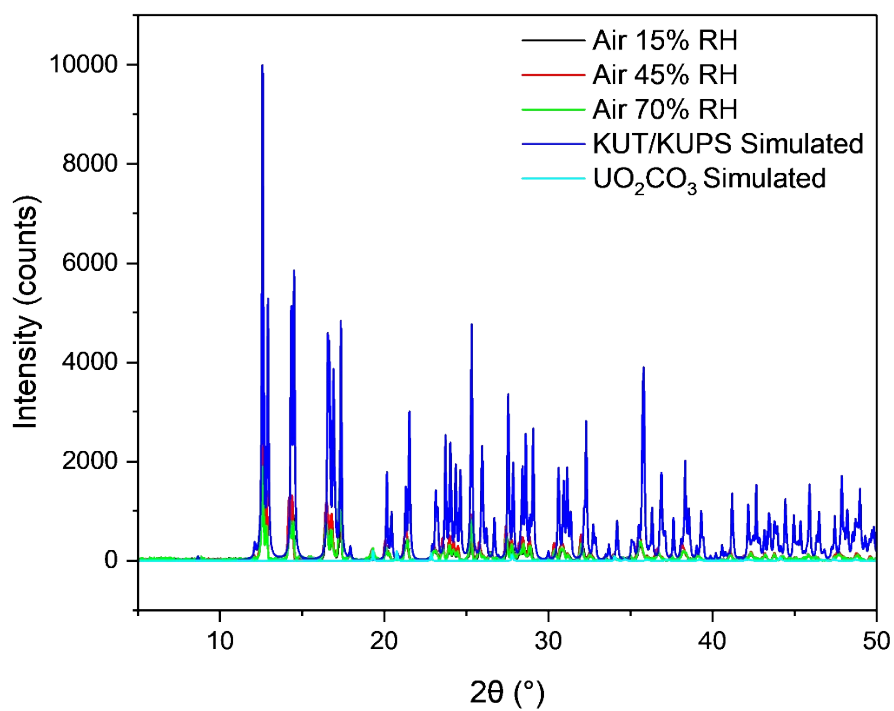

**Figure S28.** PXRD of the KUT samples following 2 hours of air exposure at 15% (black), 45% (red) and 70% (green) relative humidity matching the simulated KUT pattern (blue) and the simulated UO<sub>2</sub>CO<sub>3</sub> (Rutherfordine) pattern (teal).

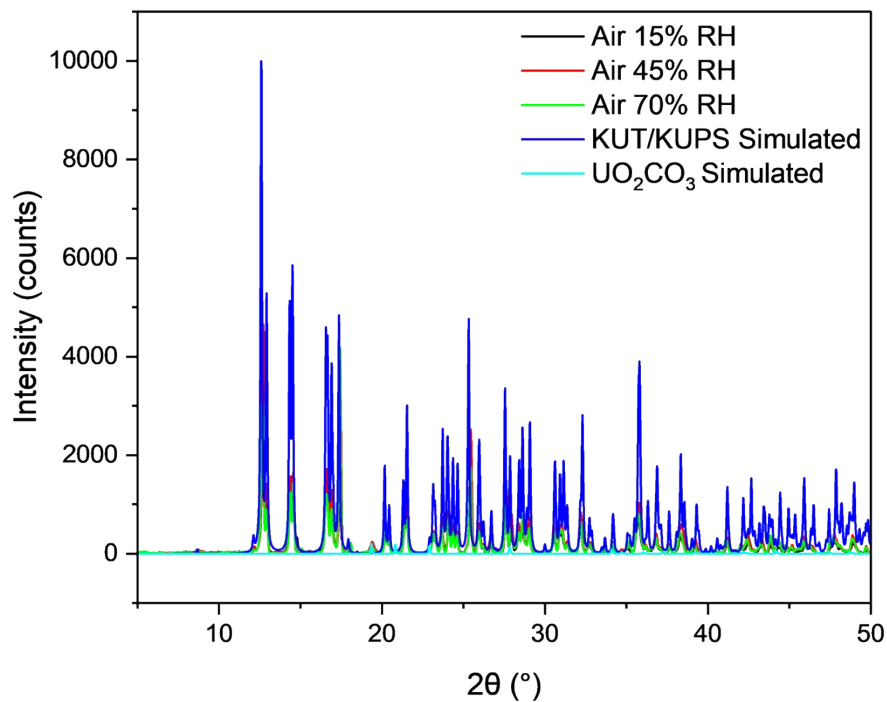

**Figure S29.** PXRD of the KUPS samples following 2 hours of air exposure at 15% (black), 45% (red) and 70% (green) relative humidity matching the simulated KUPS pattern (blue) and the simulated  $\text{UO}_2\text{CO}_3$  (Rutherfordine) pattern (teal).

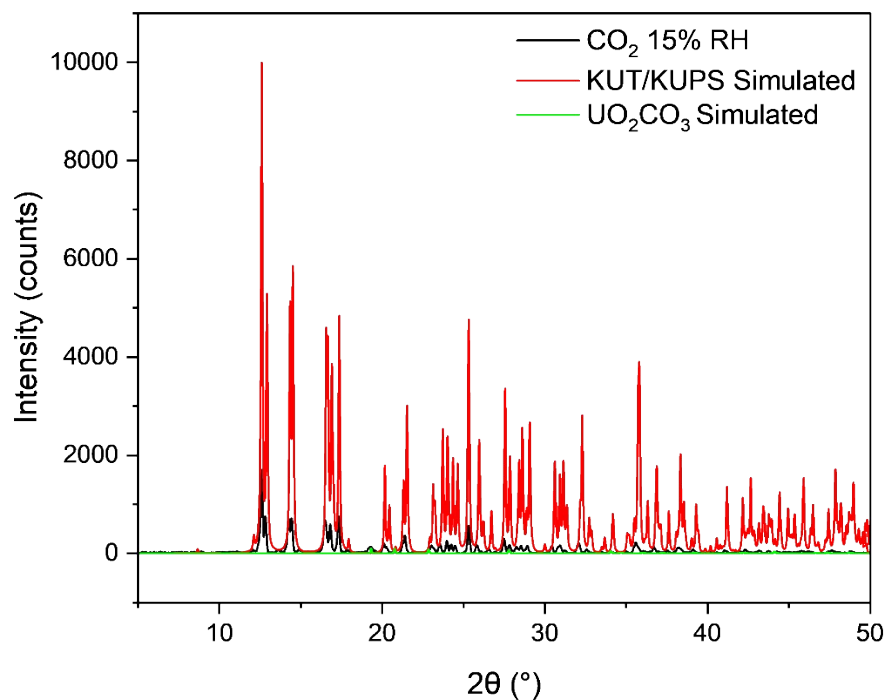

**Figure S30.** PXRD of KUT following 2 hours of  $\text{CO}_2$  exposure with 15% relative humidity (black), the simulated KUT pattern (red) and the simulated  $\text{UO}_2\text{CO}_3$  (Rutherfordine) pattern (green).

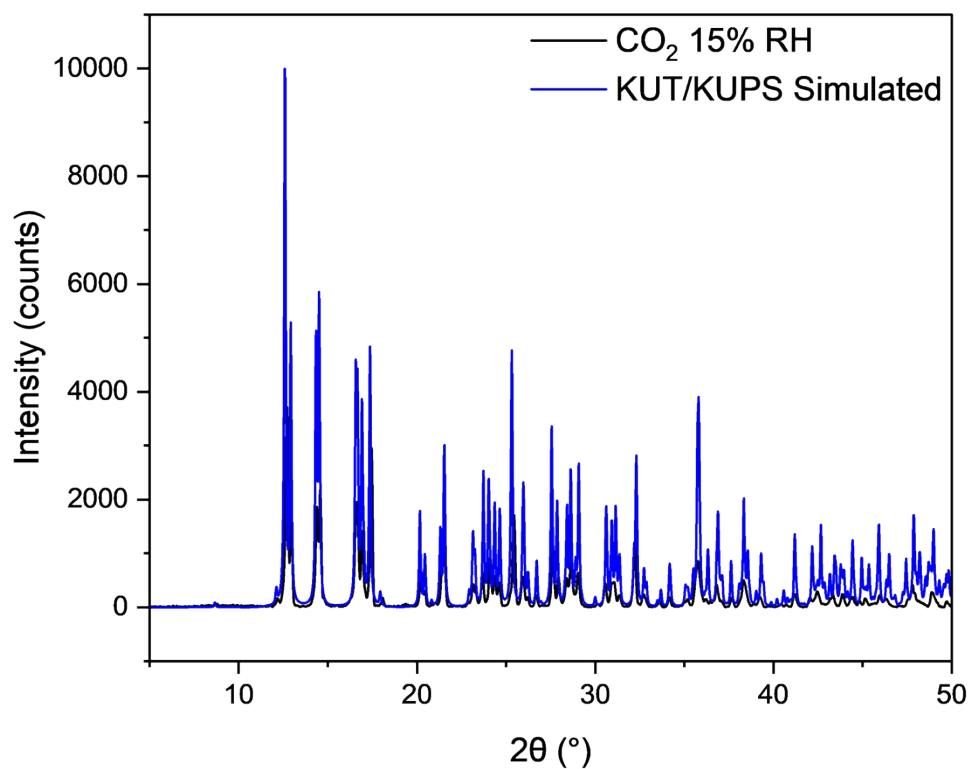

**Figure S31.** PXRD of KUPS following 2 hours of CO<sub>2</sub> exposure with 15% relative humidity (black) showing retention of the KUPS phase with the simulated KUPS pattern in blue.

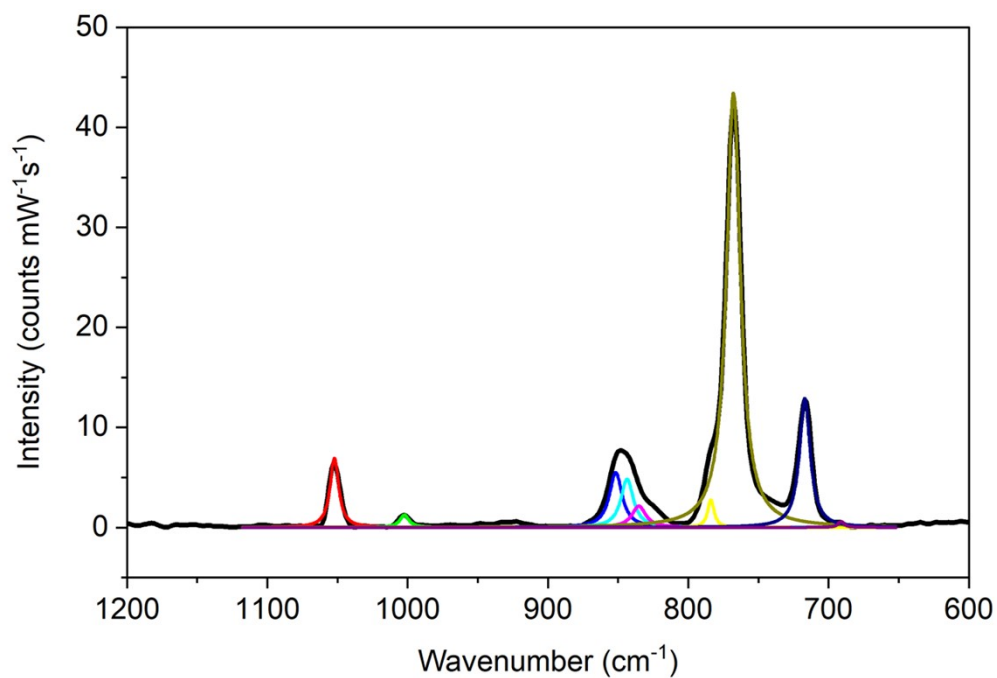

**Figure S32.** Raman Spectrum of KUT-1 exposed to ambient laboratory air for 24 hours, demonstrating carbonation with band at 1052 cm<sup>-1</sup> ( $\chi^2 = 0.23$ ;  $R^2 = 0.994$ ).

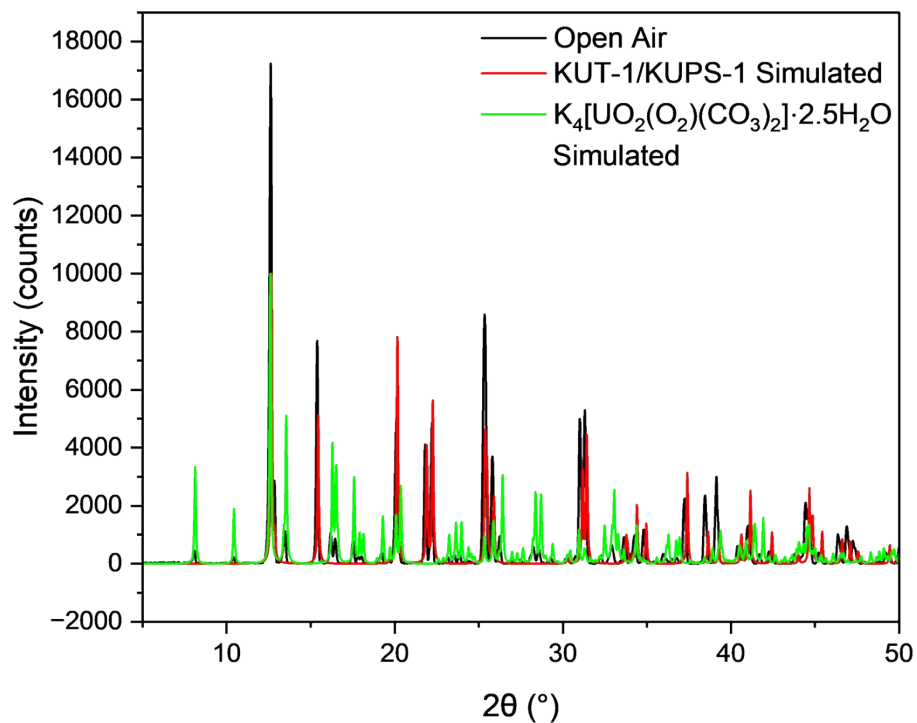

**Figure S33.** PXRD of the KUT-1 sample exposed to open air for 1 day (black), simulated KUT-1 (red) and simulated potassium uranyl peroxo-carbonate (green).

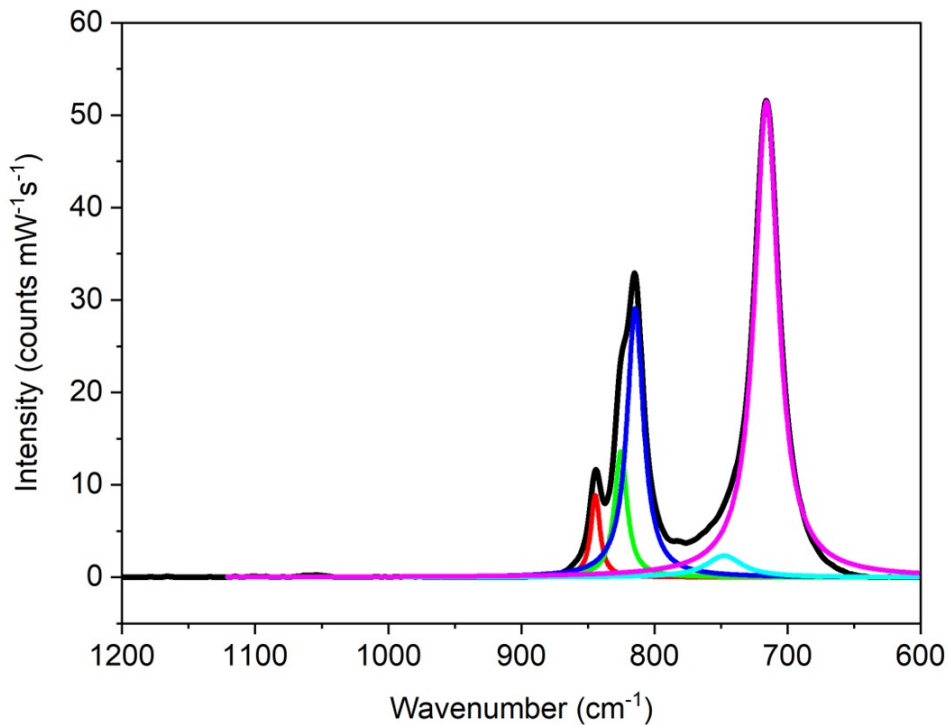

**Figure S34.** Raman Spectrum of KUT-1 exposed to a continuous flow of air for 24 hours, demonstrating decomposition of lattice H<sub>2</sub>O<sub>2</sub> and conversion to KUT ( $\chi^2 = 0.26$ ;  $R^2 = 0.998$ ).

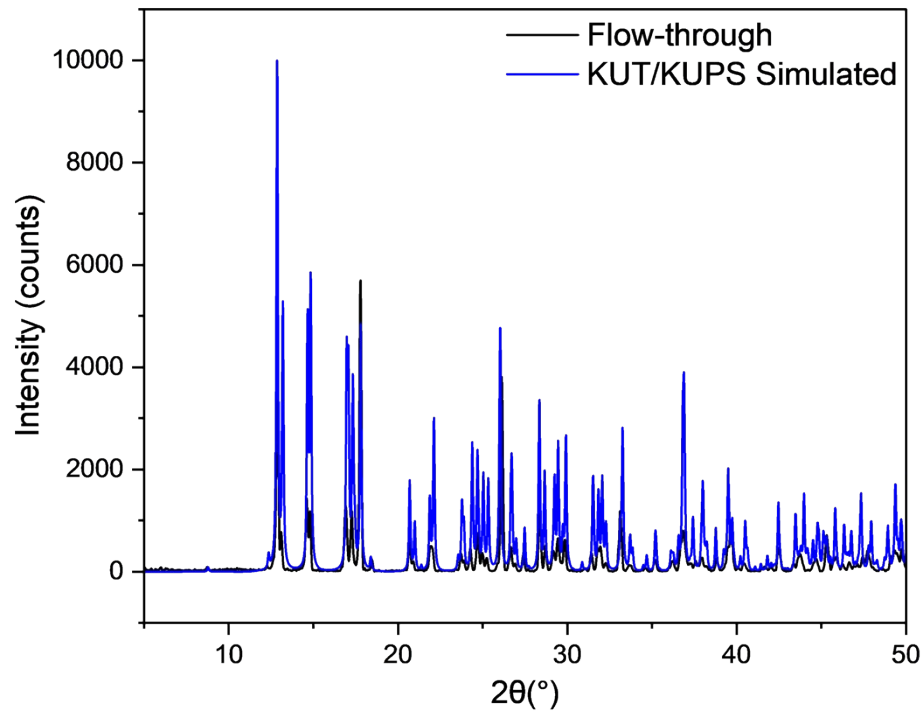

**Figure S35.** PXRD of the KUT-1 sample exposed to a continuous flow of air for 24 hours (black), demonstrating decomposition of lattice  $\text{H}_2\text{O}_2$  and conversion to KUT (simulated pattern in blue).

## Carbonation Reaction Kinetic Modelling

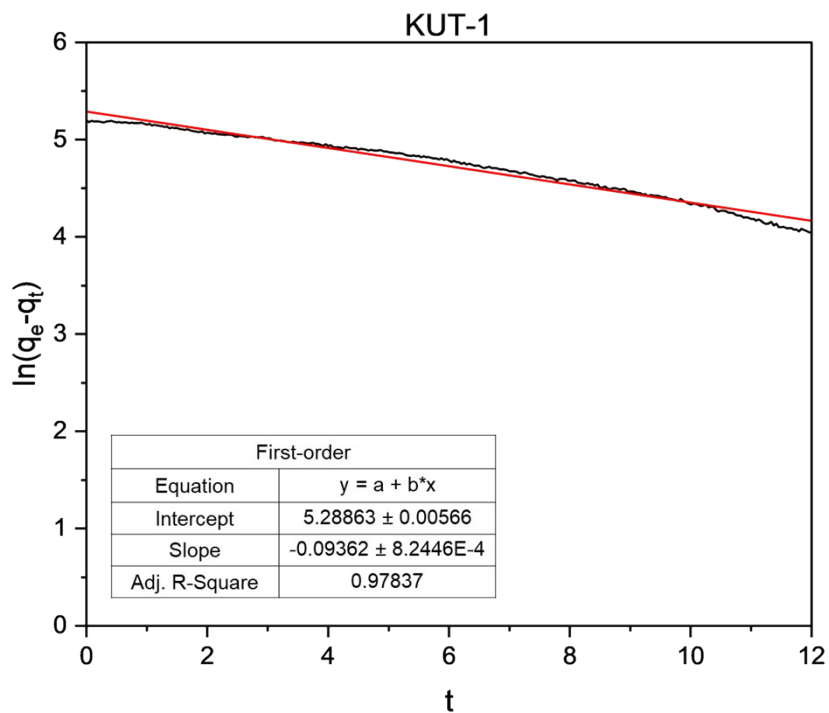

**Figure S36.** First-order modelling of the carbonation kinetics for KUT-1 where  $t$  is time in days,  $q_e$  is the equilibrium  $\text{CO}_2$  concentration in ppm and  $q_t$  is the  $\text{CO}_2$  concentration in ppm at time  $t$ .

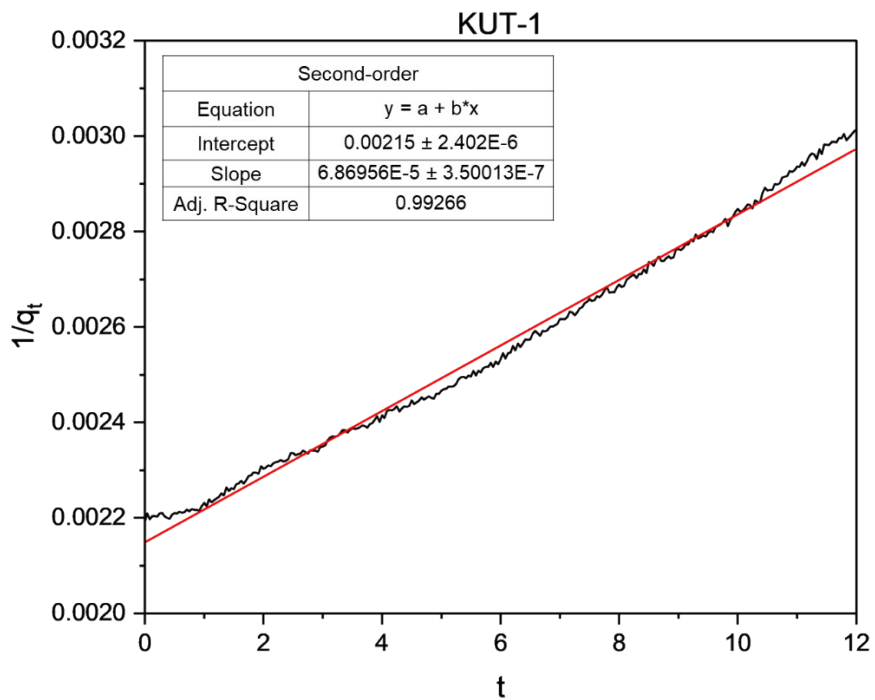

**Figure S37.** Second-order modelling of the carbonation kinetics for KUT-1 where  $t$  is time in days and  $q_t$  is the  $\text{CO}_2$  concentration in ppm at time  $t$ .

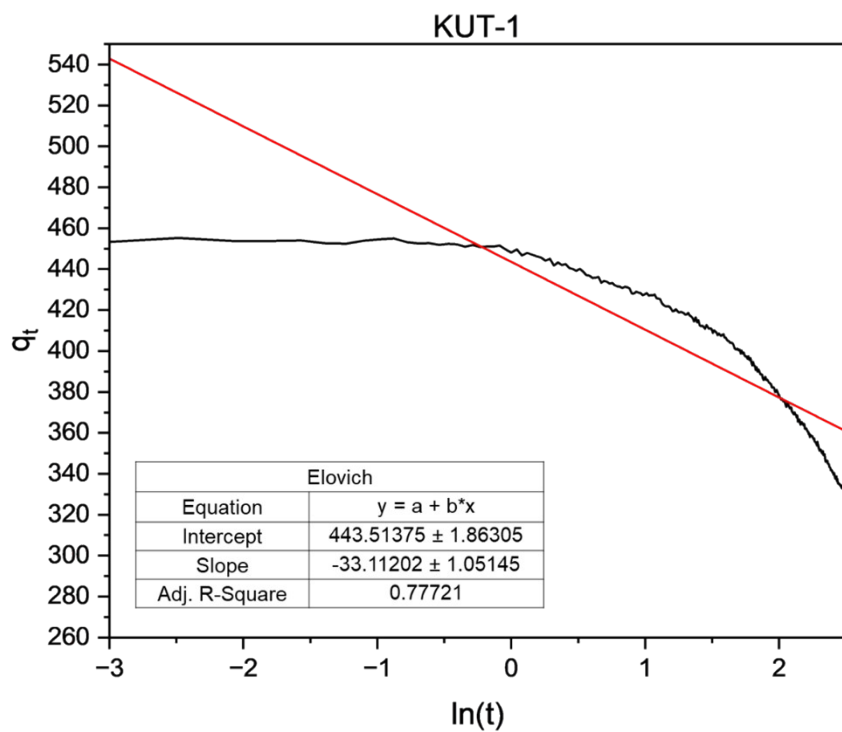

**Figure S38.** Elovich modelling of the carbonation kinetics for KUT-1 where  $t$  is time in days and  $q_t$  is the  $\text{CO}_2$  concentration in ppm at time  $t$ .

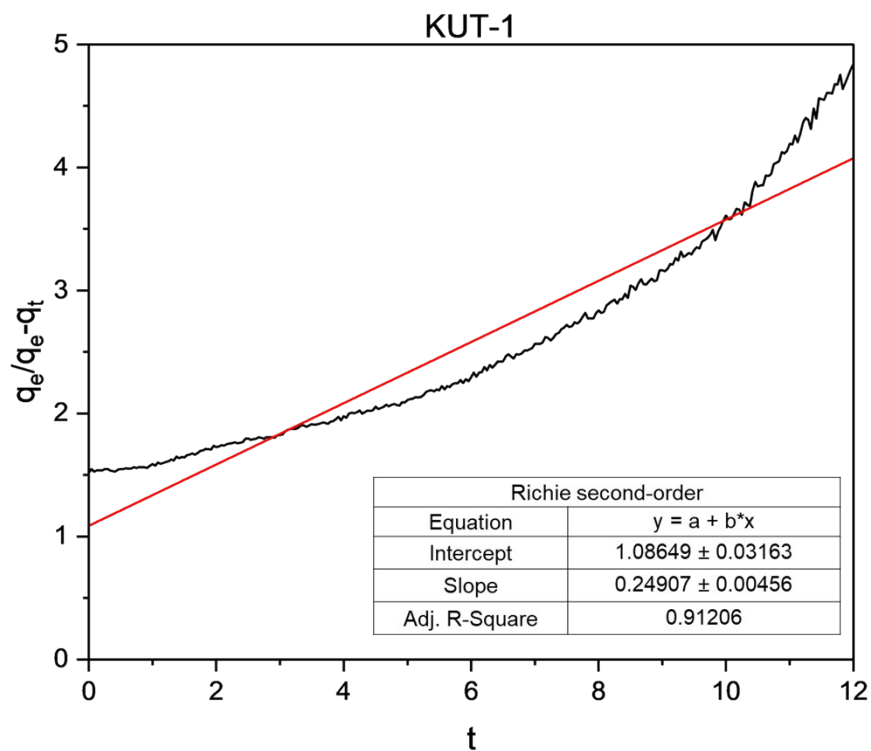

**Figure S39.** Richie second-order modelling of the carbonation kinetics for KUT-1 where  $t$  is time in days,  $q_e$  is the equilibrium  $\text{CO}_2$  concentration in ppm and  $q_t$  is the  $\text{CO}_2$  concentration in ppm at time  $t$ .

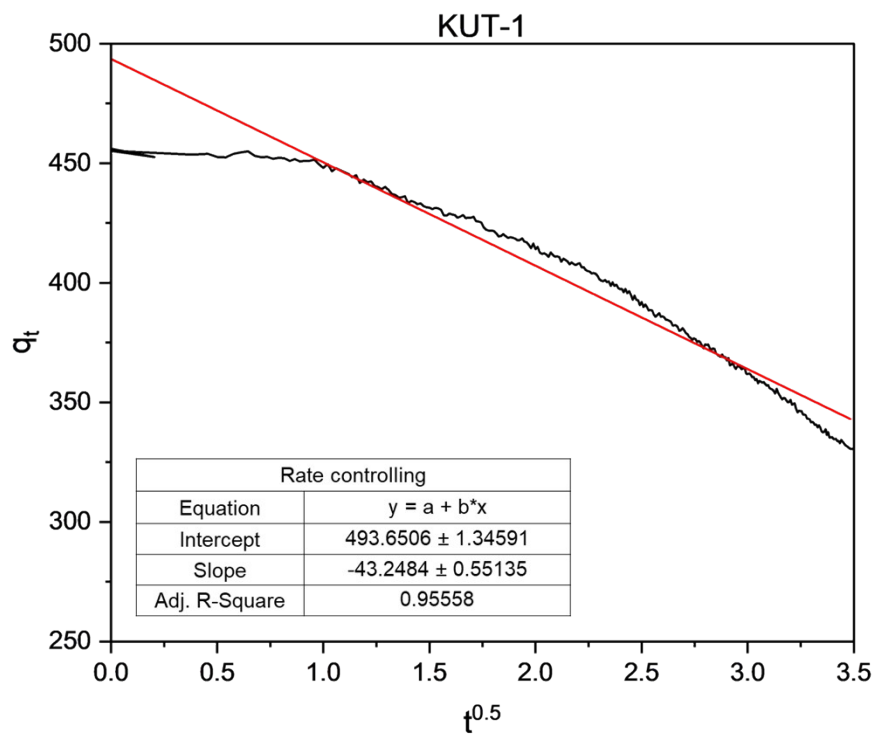

**Figure S40.** Rate controlling modelling of the carbonation kinetics for KUT-1 where  $t$  is time in days and  $q_t$  is the  $\text{CO}_2$  concentration in ppm at time  $t$ .

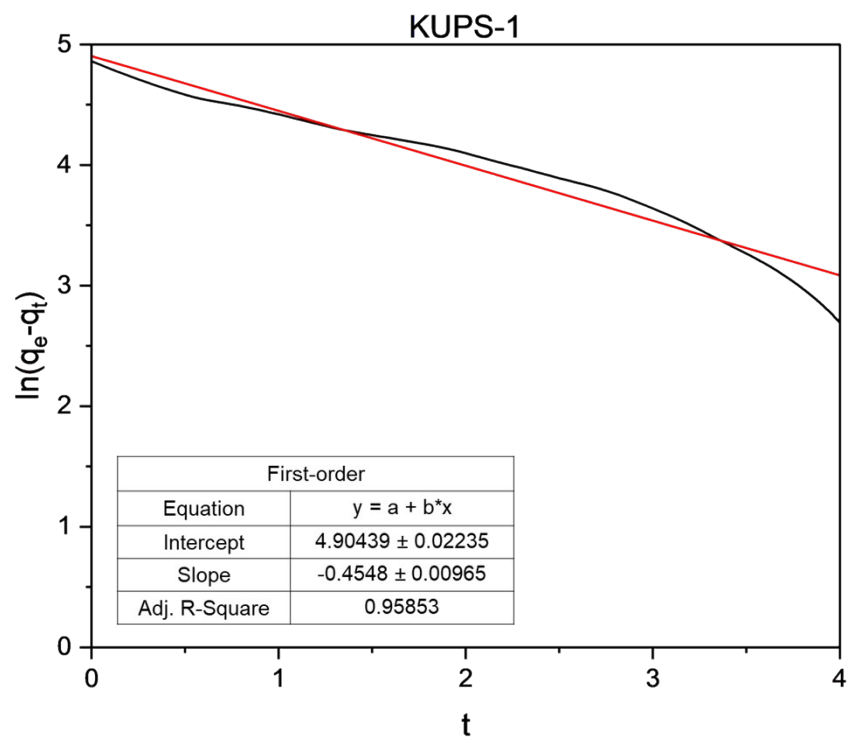

**Figure S41.** First-order modelling of the carbonation kinetics for KUPS-1 where  $t$  is time in days,  $q_e$  is the equilibrium  $\text{CO}_2$  concentration in ppm and  $q_t$  is the  $\text{CO}_2$  concentration in ppm at time  $t$ .



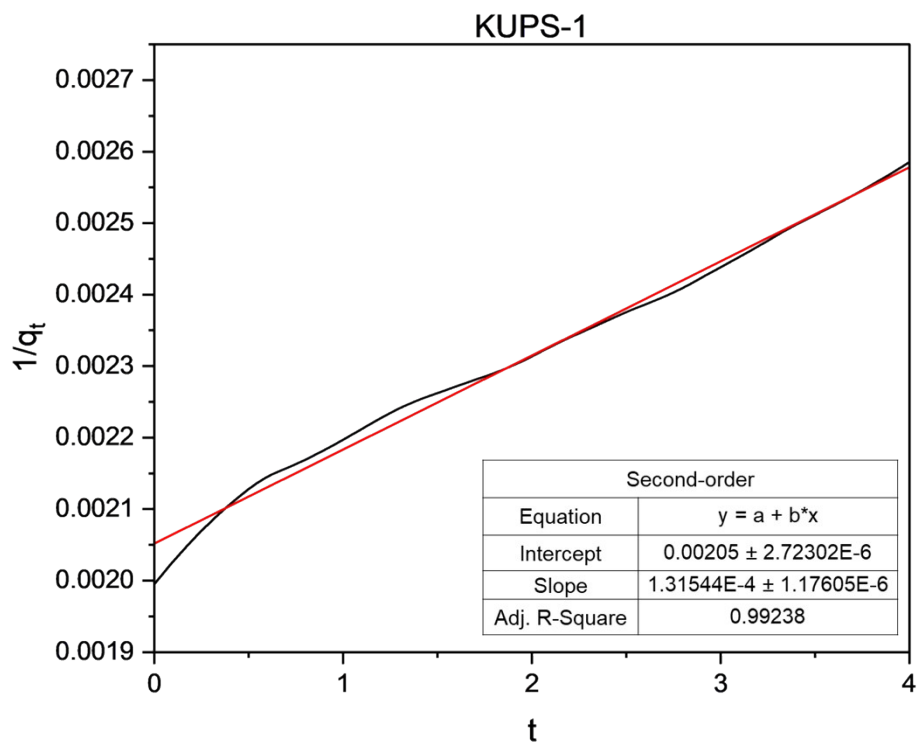

**Figure S42.** Second-order modelling of the carbonation kinetics for KUPS-1 where  $t$  is time in days and  $q_t$  is the  $\text{CO}_2$  concentration in ppm at time  $t$ .

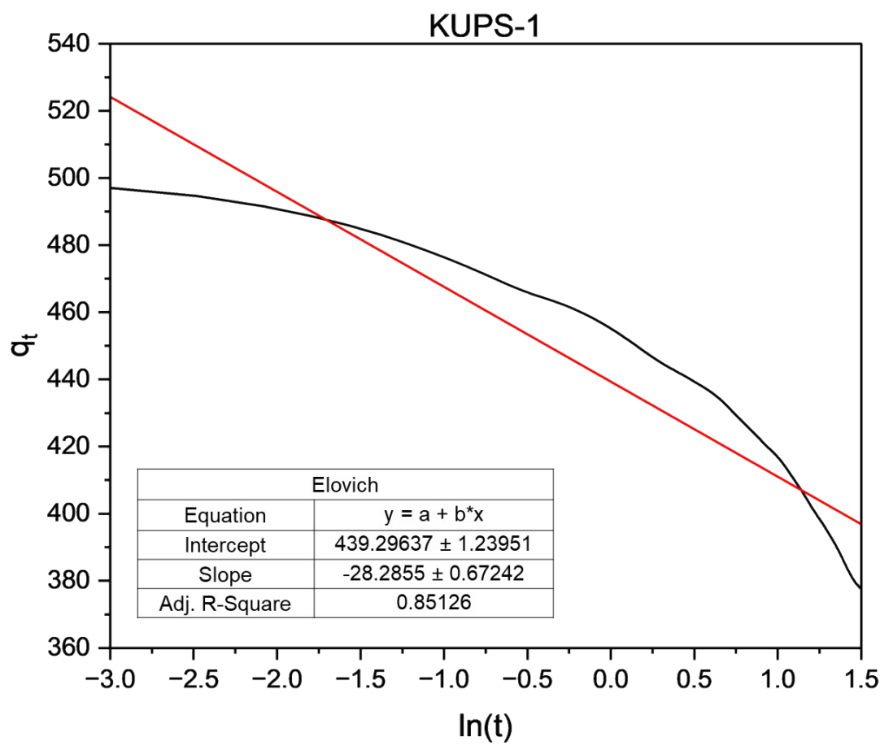

**Figure S43.** Elovich modelling of the carbonation kinetics for KUPS-1 where  $t$  is time in days and  $q_t$  is the  $\text{CO}_2$  concentration in ppm at time  $t$ .

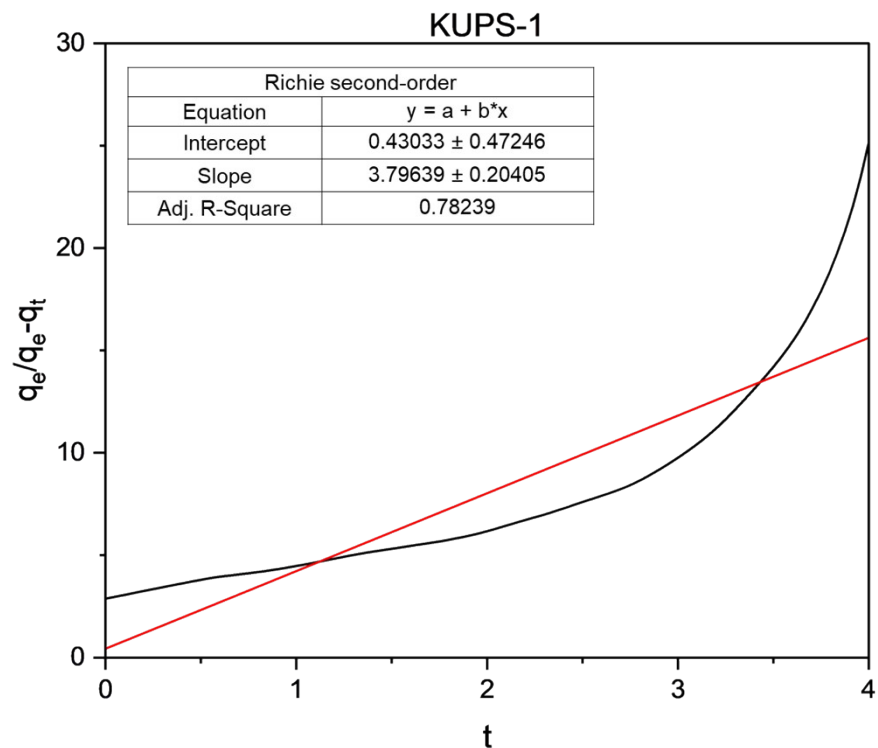

**Figure S44.** Richie second-order modelling of the carbonation kinetics for KUPS-1 where  $t$  is time in days,  $q_e$  is the equilibrium  $\text{CO}_2$  concentration in ppm and  $q_t$  is the  $\text{CO}_2$  concentration in ppm at time  $t$ .

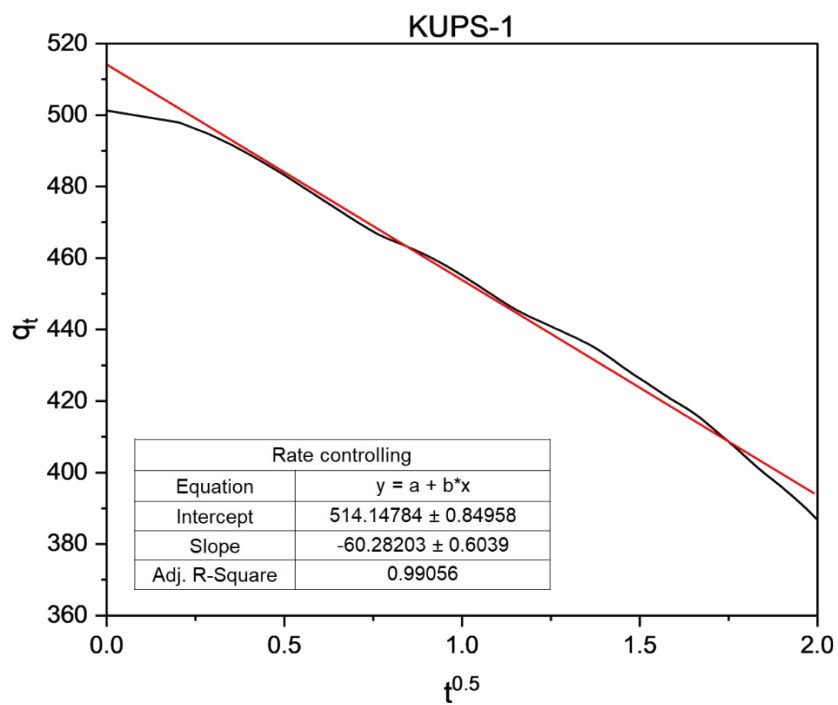

**Figure S45.** Rate controlling modelling of the carbonation kinetics for KUPS-1 where  $t$  is time in days and  $q_t$  is the  $\text{CO}_2$  concentration in ppm at time  $t$ .

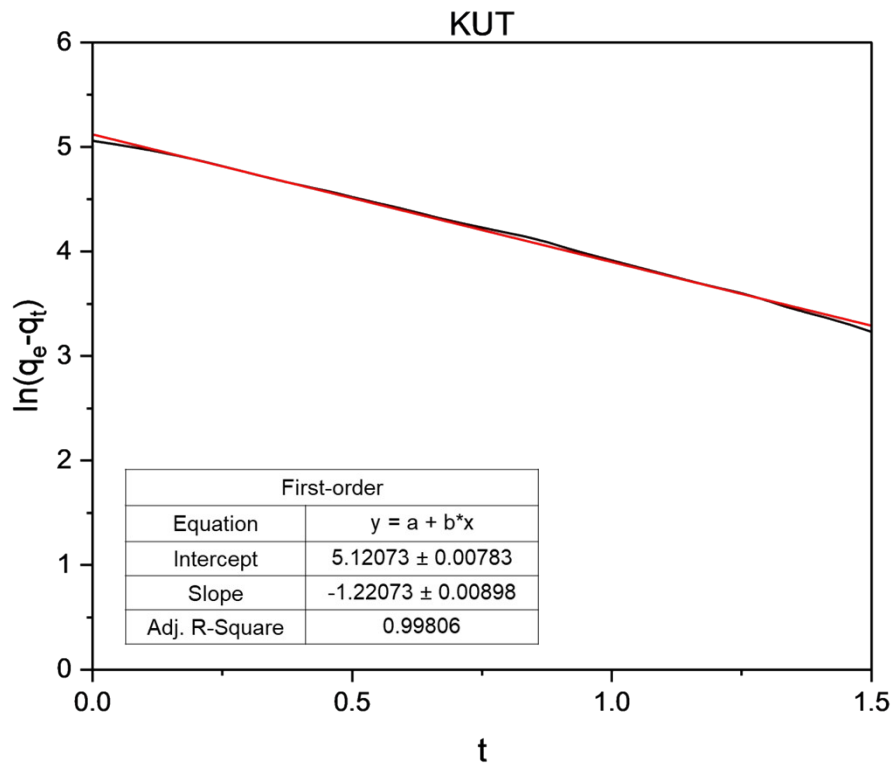

**Figure S46.** First-order modelling of the carbonation kinetics for KUT where  $t$  is time in days,  $q_e$  is the equilibrium  $\text{CO}_2$  concentration in ppm and  $q_t$  is the  $\text{CO}_2$  concentration in ppm at time  $t$ .

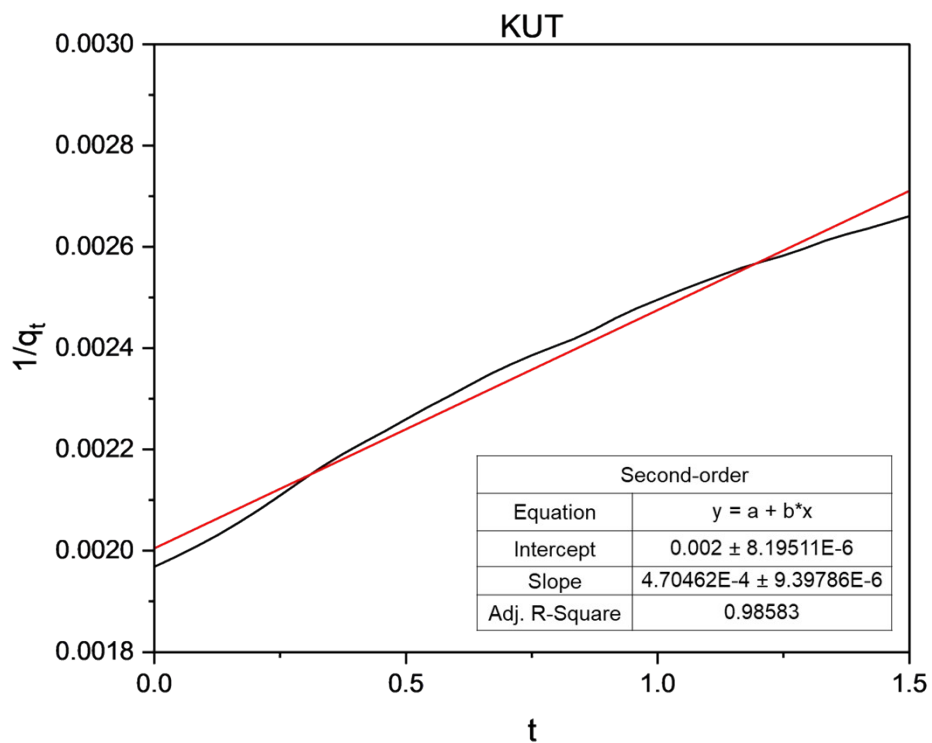

**Figure S47.** Second-order modelling of the carbonation kinetics for KUT where  $t$  is time in days and  $q_t$  is the  $\text{CO}_2$  concentration in ppm at time  $t$ .

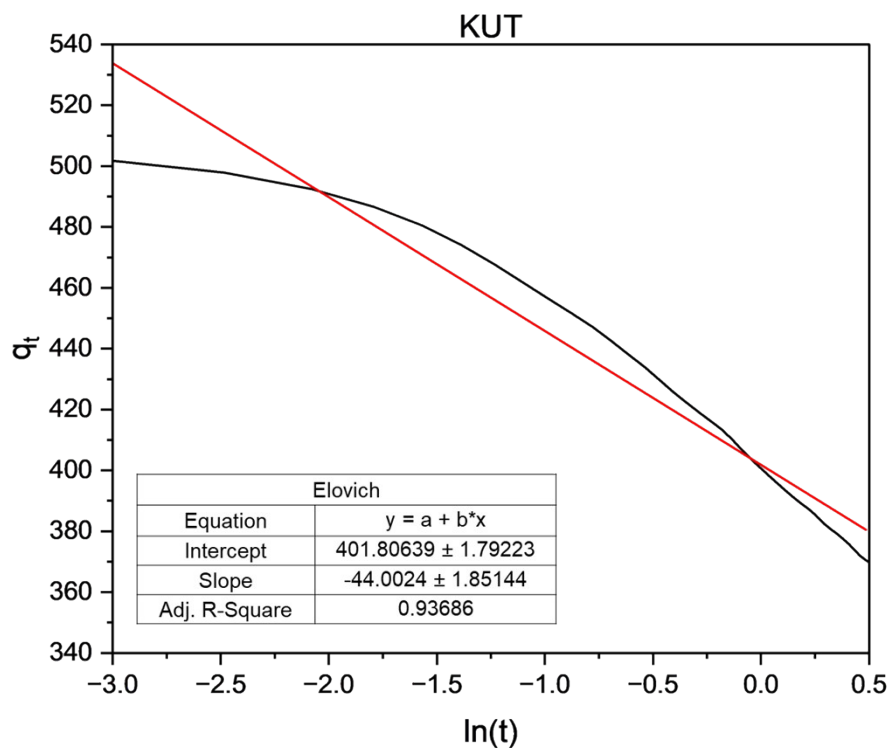

**Figure S48.** Elovich modelling of the carbonation kinetics for KUT where  $t$  is time in days and  $q_t$  is the  $\text{CO}_2$  concentration in ppm at time  $t$ .

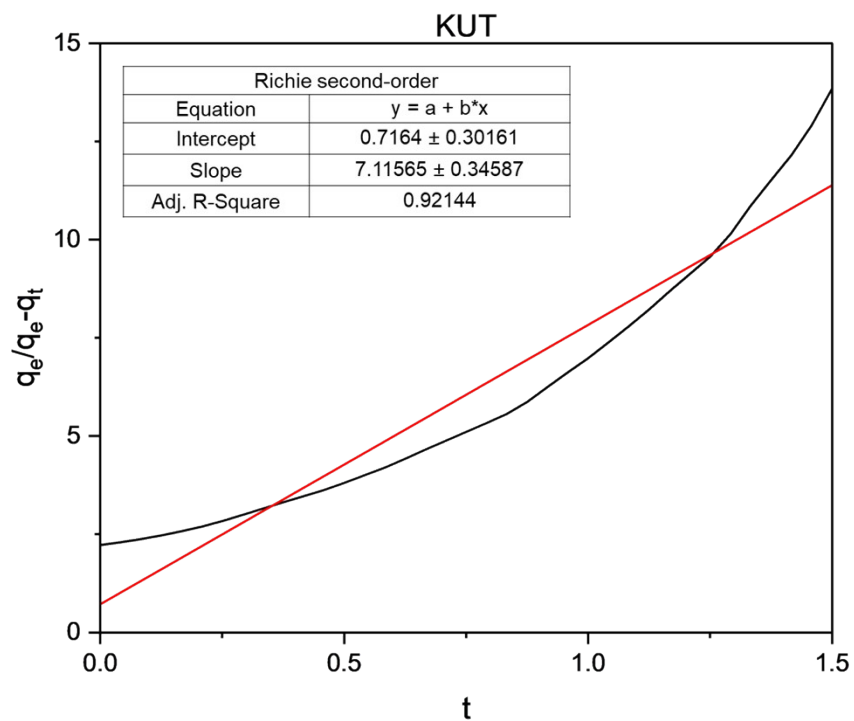

**Figure S49.** Richie second-order modelling of the carbonation kinetics for KUT where  $t$  is time in days,  $q_e$  is the equilibrium  $\text{CO}_2$  concentration in ppm and  $q_t$  is the  $\text{CO}_2$  concentration in ppm at time  $t$ .

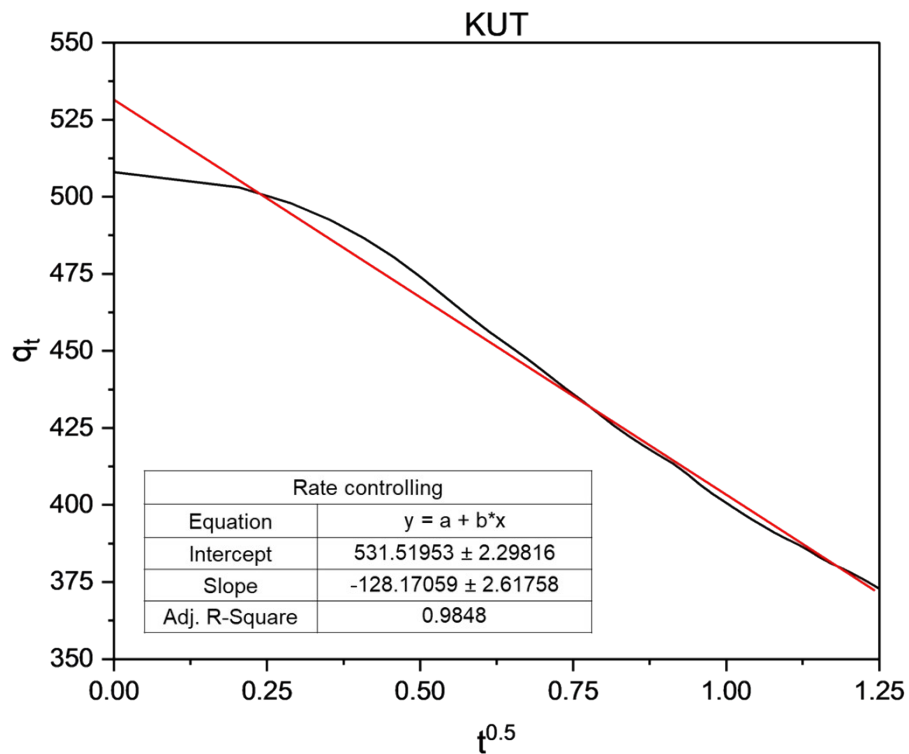

**Figure S50.** Rate controlling modelling of the carbonation kinetics for KUT where  $t$  is time in days and  $q_t$  is the  $\text{CO}_2$  concentration in ppm at time  $t$ .

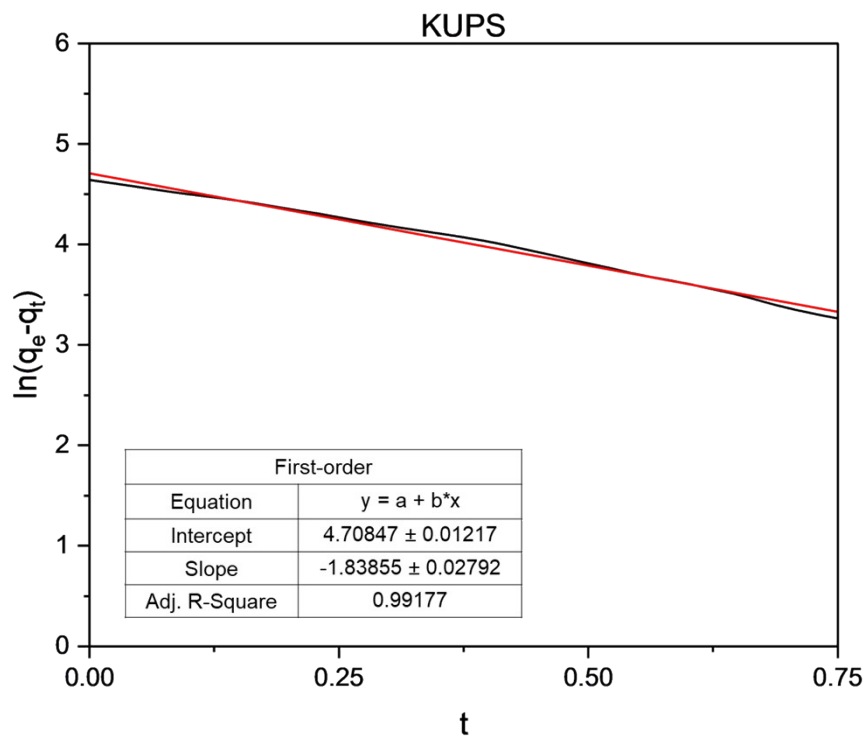

**Figure S51.** First-order modelling of the carbonation kinetics for KUPS where  $t$  is time in days,  $q_e$  is the equilibrium  $\text{CO}_2$  concentration in ppm and  $q_t$  is the  $\text{CO}_2$  concentration in ppm at time  $t$ .

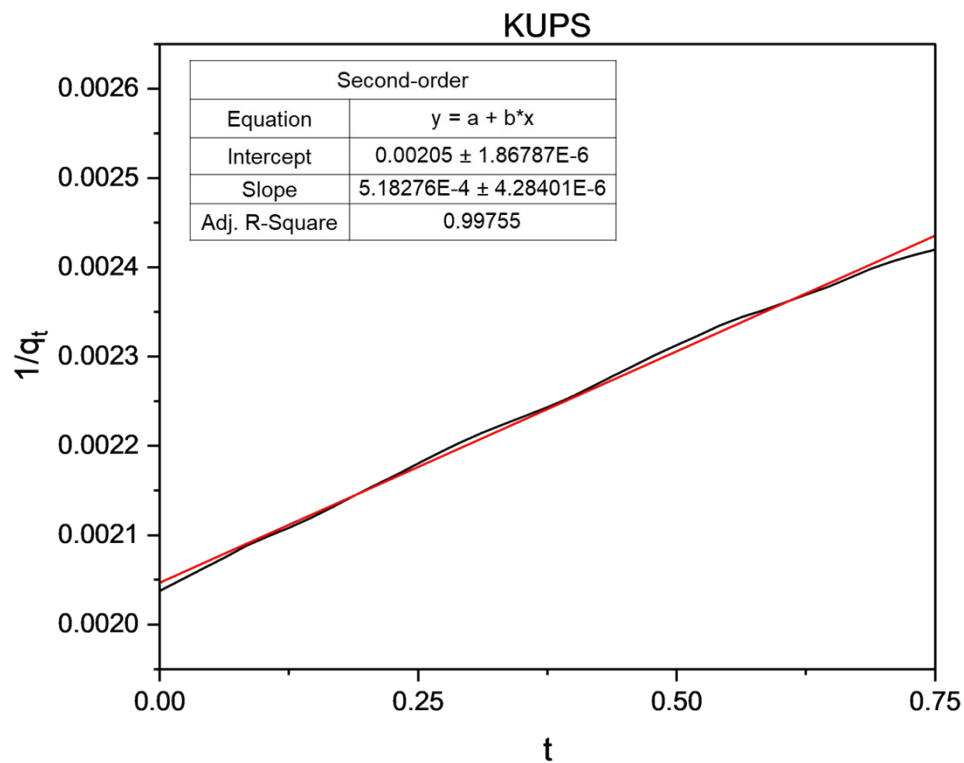

**Figure S52.** Second-order modelling of the carbonation kinetics for KUPS where  $t$  is time in days and  $q_t$  is the  $\text{CO}_2$  concentration in ppm at time  $t$ .

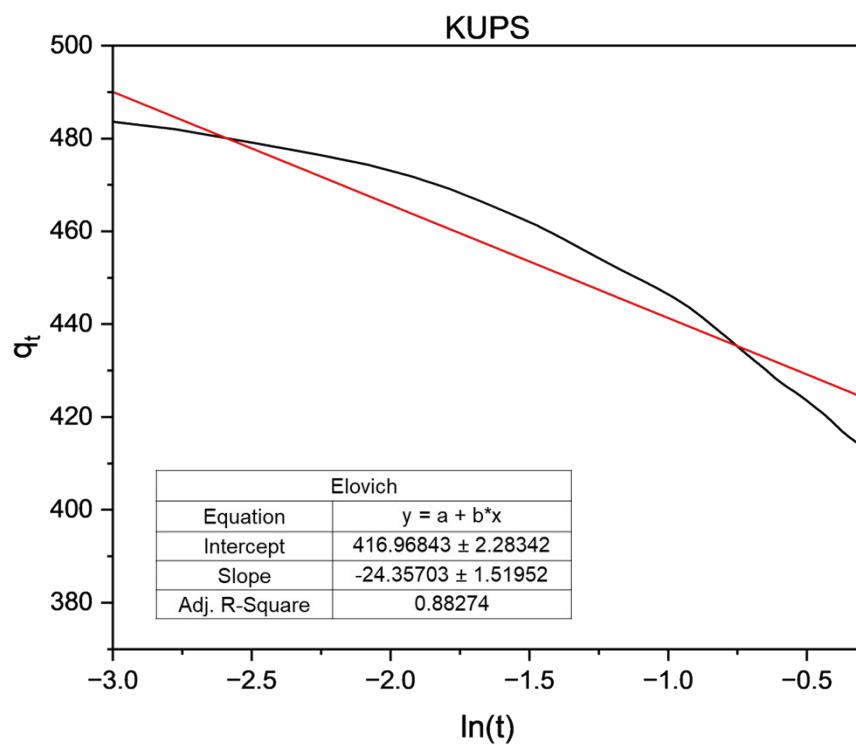

**Figure S53.** Elovich modelling of the carbonation kinetics for KUPS where  $t$  is time in days and  $q_t$  is the  $\text{CO}_2$  concentration in ppm at time  $t$ .

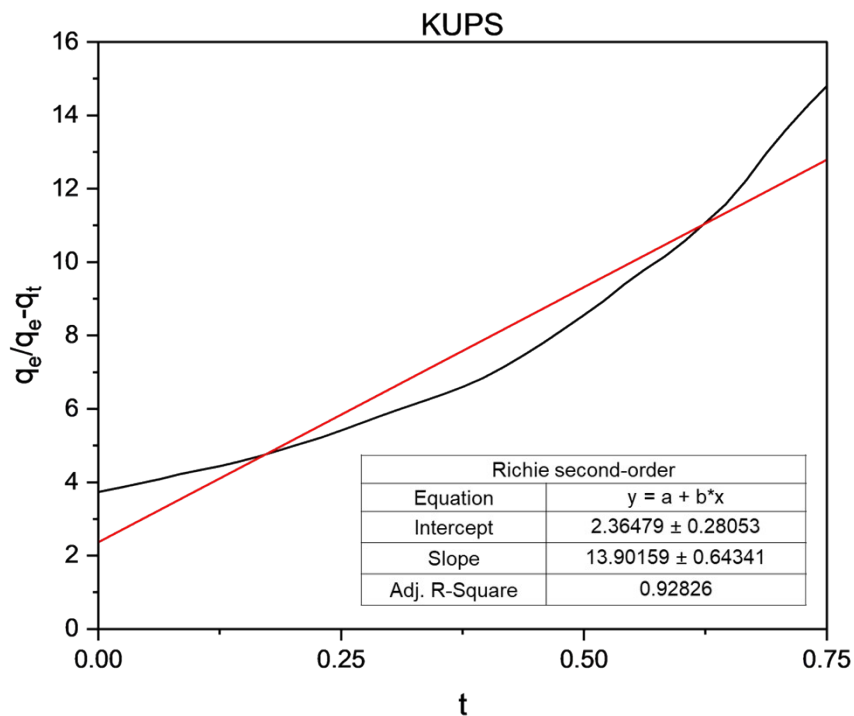

**Figure S54.** Richie second-order modelling of the carbonation kinetics for KUPS where  $t$  is time in days,  $q_e$  is the equilibrium  $\text{CO}_2$  concentration in ppm and  $q_t$  is the  $\text{CO}_2$  concentration in ppm at time  $t$ .

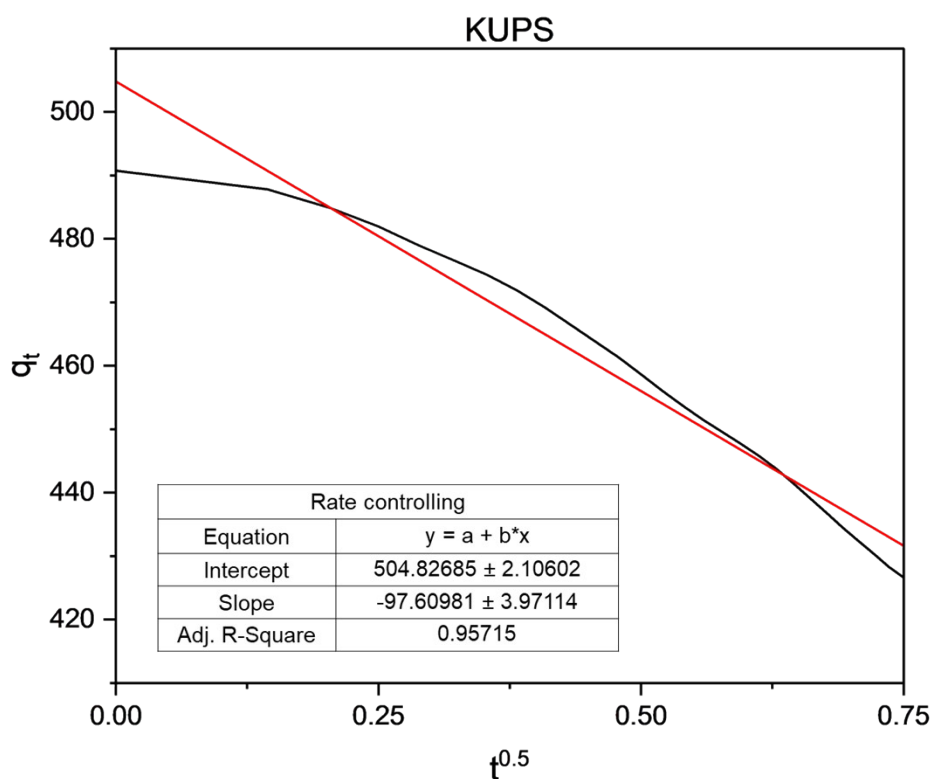

**Figure S55.** Rate controlling modelling of the carbonation kinetics for KUPS where  $t$  is time in days and  $q_t$  is the  $\text{CO}_2$  concentration in ppm at time  $t$ .
